1 **USP22 controls type III interferon signaling and SARS-CoV-2 infection through**  
2 **activation of STING**

3

4 *Rebekka Karlowitz*<sup>1</sup>, *Megan L. Stanifer*<sup>2,3</sup>, *Jens Roedig*<sup>1</sup>, *Geoffroy Andrieux*<sup>4, 5</sup>,  
5 *Denisa Bojkova*<sup>6</sup>, *Sonja Smith*<sup>1</sup>, *Lisa Kowald*<sup>1</sup>, *Ralf Schubert*<sup>7</sup>, *Melanie Boerries*<sup>4, 5</sup>,  
6 *Jindrich Cinatl Jr.*<sup>6</sup>, *Steeve Boulant*<sup>3,8</sup>, *Sjoerd J. L. van Wijk*<sup>1,9,#</sup>

7

8 <sup>1</sup> Institute for Experimental Cancer Research in Pediatrics, Goethe University Frankfurt,  
9 Komturstrasse 3a, 60528 Frankfurt am Main, Germany

10 <sup>2</sup> Department of Infectious Diseases/Molecular Virology, Medical Faculty, Center for  
11 Integrative Infectious Diseases Research (CIID), University of Heidelberg, 69120  
12 Heidelberg, Germany

13 <sup>3</sup> Department of Molecular Genetics and Microbiology, University of Florida College of  
14 Medicine, Gainesville, Florida, USA

15 <sup>4</sup> Institute of Medical Bioinformatics and Systems Medicine, Medical Center-University  
16 of Freiburg, Faculty of Medicine, University of Freiburg, 79110 Freiburg, Germany

17 <sup>5</sup> German Cancer Consortium (DKTK) and German Cancer Research Center (DKFZ),  
18 partner site Freiburg, 79110 Freiburg, Germany

19 <sup>6</sup> Institute of Medical Virology, University Hospital Frankfurt, Goethe University, 60596  
20 Frankfurt am Main, Germany

21 <sup>7</sup> Division for Allergy, Pneumology and Cystic Fibrosis, Department for Children and  
22 Adolescents, University Hospital Frankfurt, Goethe University, Theodor-Stern-Kai 7,  
23 60590 Frankfurt am Main, Germany.

24 <sup>8</sup> Department of Infectious Diseases, Virology, Medical Faculty, Center for Integrative  
25 Infectious Diseases Research (CIID), University of Heidelberg, 69120 Heidelberg,  
26 Germany

27

28 <sup>9</sup> German Cancer Consortium (DKTK) and German Cancer Research Center (DKFZ)  
29 partner site Frankfurt/Mainz, Frankfurt am Main, Germany

30

31 **Running title:** USP22 controls type III IFN signaling and SARS-CoV-2 infection

32

33 # Corresponding author: Sjoerd J. L. van Wijk, Institute for Experimental Cancer  
34 Research in Pediatrics, Goethe University Frankfurt, Komturstrasse 3a, 60528  
35 Frankfurt am Main, Germany, Phone: +49 69 67866574, Fax: +49 69 6786659158,  
36 Email: [vanWijk@med.uni-frankfurt.de](mailto:vanWijk@med.uni-frankfurt.de), [s.wijk@kinderkrebsstiftung-frankfurt.de](mailto:s.wijk@kinderkrebsstiftung-frankfurt.de)

37

38

39

40 **Abstract**

41 Pattern recognition receptors (PRRs) and interferons (IFNs) serve as essential antiviral  
42 defense against SARS-CoV-2, the causative agent of the COVID-19 pandemic. Type  
43 III IFN (IFN- $\lambda$ ) exhibit cell-type specific and long-lasting functions in autoinflammation,  
44 tumorigenesis and antiviral defense. Here, we identify the deubiquitinating enzyme  
45 USP22 as central regulator of basal IFN- $\lambda$  secretion and SARS-CoV-2 infections in  
46 native human intestinal epithelial cells (hIECs). USP22-deficient hIECs strongly  
47 upregulate genes involved in IFN signaling and viral defense, including numerous IFN-  
48 stimulated genes (ISGs), with increased secretion of IFN- $\lambda$  and enhanced STAT1  
49 signaling, even in the absence of exogenous IFNs or viral infection. Interestingly,  
50 USP22 controls basal and 2'3'-cGAMP-induced STING activation and loss of STING  
51 reversed STAT activation and ISG and IFN- $\lambda$  expression. Intriguingly, USP22-deficient  
52 hIECs are protected against SARS-CoV-2 infection, viral replication and the formation  
53 of *de novo* infectious particles, in a STING-dependent manner. These findings reveal  
54 USP22 as central host regulator of STING and type III IFN signaling, with important  
55 implications for SARS-CoV-2 infection and antiviral defense.

56

57 **Key words:** USP22, STING, cGAS, interferon, SARS-CoV-2, ISG, ubiquitin,  
58 deubiquitinating enzyme, pattern recognition receptors

59

## 60 **Introduction**

61 Sensing of “non-self” is a key feature of innate immunity and underlies the recognition  
62 of viruses, bacteria and fungi, but also plays important roles in cancer and auto-  
63 immune diseases <sup>1,2</sup>. Pattern recognition receptors (PRRs), like Toll-like receptors  
64 (TLRs), Nucleotide-binding oligomerization domain (NOD)-like receptors (NLRs) and  
65 retinoic acid-inducible gene 1 protein (RIG-I)-like receptors (RLRs) are essential  
66 components of innate immune signaling and selectively recognize pathogen-  
67 associated molecular patterns (PAMPs). Dedicated PRRs, like TLR3, RIG-I,  
68 Melanoma differentiation-associated protein 5 (MDA5) and Cyclic GMP-AMP synthase  
69 (cGAS)-Stimulator of interferon genes protein (STING) recognize viral double stranded  
70 RNA (dsRNA) and dsDNA, and are important sensors for infections with RNA and DNA  
71 viruses, as well as infections with retroviruses <sup>1-3</sup>. Whereas TLR3 recognizes dsRNA  
72 in endosomes, the prototypical RLRs, RIG-I and MDA5, sense cytosolic dsRNAs, while  
73 cGAS-STING detects viral dsDNA <sup>1-4</sup>. STING is activated either directly via viral  
74 dsDNA, through the STING agonist 2'3'-cGAMP generated by the cyclic GMP-AMP  
75 synthase cGAS upon detection of viral dsDNA, or indirectly via RIG-1 and MDA5 <sup>5</sup>.  
76 Activated STING interacts with TANK-binding kinase 1 (TBK1) and activates interferon  
77 regulatory factor (IRF) 1, -3, and -7 and Nuclear factor- $\kappa$ B (NF- $\kappa$ B), leading to the  
78 initiation of anti-viral and inflammatory transcriptional programs, including interferon-  
79 stimulated genes (ISGs) and interferons (IFN) <sup>5-8</sup>.

80

81 Interferons (IFNs) are secreted cytokines with important roles in immunity and anti-viral  
82 responses. IFN signaling relies on Janus kinase-Signal transducer and activator of  
83 transcription (JAK-STAT) activation, phosphorylation of STAT1/2 and the induction of  
84 ISG and IFN gene expression that influence viral replication <sup>9,10</sup>. Although the vast  
85 majority of cell types can be triggered to express type I (IFN- $\alpha$ , - $\beta$ , - $\epsilon$ , - $\kappa$  and - $\omega$ ) and

86 type III (IFN- $\lambda$ 1, - $\lambda$ 2, - $\lambda$ 3 and - $\lambda$ 4) IFNs, the expression of IFN-specific receptors is cell  
87 type restricted and determines IFN responses. For example, the type I IFN receptor  
88 (IFNAR) is ubiquitously expressed in many tissues, whereas expression of the type III  
89 IFN receptor IFNLR1 is mainly limited to epithelial cells, e.g. the gastro-intestinal and  
90 respiratory epithelium <sup>6-8,11,12</sup>. Although type I and type III IFNs induce similar ISG  
91 signatures, type I IFNs generally trigger a more rapid increase and decay of ISG  
92 expression <sup>7</sup>. In addition, IFN- $\lambda$ s have been described to be first-in-line against viral  
93 infections and might inhibit viral spread without triggering inflammatory responses,  
94 depending on IFN- $\lambda$  receptor expression <sup>7,13,14</sup>.

95

96 The novel severe acute respiratory syndrome coronavirus 2 (SARS-CoV-2) is the  
97 causative agent of the pandemic Coronavirus disease 2019 (COVID-19) and belongs  
98 to the human coronaviruses (HCoV) that also includes SARS-CoV and MERS-CoV <sup>15</sup>.  
99 In many patients with severe COVID-19, SARS-CoV-2 infection induces the secretion  
100 of highly pro-inflammatory cytokines through cGAS-STING and NF- $\kappa$ B-mediated  
101 signaling <sup>16,17</sup>. Type I and III IFNs are important regulators of host viral defense against  
102 SARS-CoV-2 <sup>6-8,11,12,18,19</sup>, but at the same time, SARS-CoV-2 evades immune  
103 recognition via IFN and ISG suppression <sup>10,20</sup>. Prolonged expression of low basal levels  
104 of type I and III IFNs might prime host responses against virus infection, including  
105 SARS-CoV-2 <sup>21-24</sup>. Although type III IFNs restrict SARS-CoV-2 infection in intestinal  
106 and airway epithelial cells <sup>19,25-29</sup> and STING agonism reduces SARS-CoV-2 infection  
107 <sup>30-33</sup>, context-dependent damaging effects of type III IFNs on airway epithelia during  
108 viral infections have been described as well <sup>34,35</sup>.

109

110 Innate immunity, PRRs and IFN signaling is closely regulated by ubiquitination, both  
111 by the host machinery as well as through viral E3 ligases and deubiquitinating enzymes

112 (DUBs) that hijack the host ubiquitin machinery <sup>36</sup>. STING, RIG-I, TLR3 and TBK1 are  
113 positively and negatively regulated by differential modification of polyubiquitin chains,  
114 including K11, K27, K48 and K63 linked chains <sup>37,38</sup>, by a variety of E3 ligases, such  
115 as TRIM56 <sup>39</sup>, TRIM32 <sup>40</sup>, MUL1 <sup>41</sup>, AMFR <sup>42</sup>, RNF5 <sup>43</sup> and TRIM29 <sup>44</sup> and RNF26 <sup>45</sup>.  
116 The interplay and functional consequences of ubiquitin modifications are complex and  
117 include proteasomal degradation as well as stabilization of protein-protein interactions.  
118 Importantly, IFN and anti-viral signaling are also heavily regulated by DUBs, like  
119 USP13 <sup>46</sup>, USP35 <sup>47</sup> and CYLD <sup>48</sup>

120

121 Ubiquitin-specific peptidase 22 (USP22) is a DUB that is part of the deubiquitination  
122 module of the Spt-Ada-Gcn5-acetyltransferase (SAGA) complex, through which it  
123 regulates transcription via the control of histone H2A K119 and H2B K120  
124 monoubiquitination (H2AK119ub1 and H2BK120ub1, respectively) <sup>49-51</sup>. Recently,  
125 additional USP22 substrates have emerged, with important roles in cell fate regulation  
126 and programmed cell death <sup>52-54</sup>. Interestingly, USP22 has mostly been associated with  
127 IFN signaling and ISG expression upon infection with viruses <sup>55,56</sup>. However, up till now,  
128 the mechanisms how USP22 primes PRR and IFN signaling and prepares against anti-  
129 viral defense in native, uninfected settings remains unknown.

130

131 In light of the current COVID-19 pandemic and potential future pathogenic  
132 coronaviruses, identifying host factors that control SARS-CoV-2 infection is of extreme  
133 relevance. The roles of type III IFN in SARS-CoV-2 infections are only starting to  
134 emerge and are determined by tissue-specific factors as well. Here, we are the first to  
135 identify USP22 as a negative regulator of basal ISG expression, JAK/STAT activation  
136 and IFN signaling, even in the absence of exogenous IFNs or viral infection. Our  
137 findings elucidate USP22 as crucial host factor in shaping SARS-CoV-2 antiviral

138 defense by priming cellular anti-viral responsiveness prior to virus infection. Loss of  
139 USP22 in native, human intestinal epithelial cells (hIECs) triggers a strong upregulation  
140 of ISGs and, specifically, the type III IFN IFN- $\lambda$ , mediated by STING. USP22 controls  
141 basal and 2'3'-cGAMP-induced STING ubiquitination, phosphorylation and activation,  
142 and combined loss of USP22 and STING rescues ISG expression, STAT signaling and  
143 IFN- $\lambda$  production. Importantly, we found that USP22-deficient hIECs are prominently  
144 protected against SARS-CoV-2 infection, replication and the formation of novel  
145 infectious viral particles, which can be partially reversed by loss of STING expression.  
146

147 **Results**

148 ***Profiling USP22-mediated gene expression in HT-29 hIECs***

149 Substrate-specific deubiquitination is a central determinant of ubiquitin homeostasis  
150 and regulates receptor activation and internalization, proteasomal degradation and  
151 transcription. For the ubiquitin-specific protease USP22, both transcriptional and  
152 extranuclear targets have been identified. As part of the DUB module of the SAGA  
153 complex, USP22 regulates transcriptional elongation via H2AK119ub1 and  
154 H2BK120ub1<sup>49-51</sup>. Up till now, the spectrum of target genes regulated by USP22  
155 largely remains unclear, partially due to organism-, cell- and context-dependent  
156 redundancy in alternative DUBs that might compensate for loss of USP22<sup>57</sup>. We  
157 previously reported that CRISPR/Cas9-mediated knockout (KO) of USP22 in human  
158 colon carcinoma cell line HT-29 affects RIPK3 ubiquitination during necroptosis, but  
159 without inducing major changes in RIPK1, RIPK3 and MLKL gene expression<sup>54</sup>,  
160 suggesting gene-specific regulation of USP22. To identify the spectrum of USP22-  
161 regulated genes, we profiled USP22-dependent changes in gene expression in the  
162 human intestinal epithelial cell (hIEC) line HT-29. Quantification of alterations in gene  
163 expression in two independent HT-29 USP22 KO single cell clones revealed a marked  
164 alteration in gene expression, with 401 genes up-regulated and 182 down-regulated  
165 **(Figure 1A and Supplemental Figure 1A)**. Loss of USP22 expression was  
166 accompanied with changes in H2Bub1, but not H2Aub1 **(Supplemental Figure 1B &**  
167 **C)**. Among the top-50 differentially regulated genes, 30 were up- and 20  
168 downregulated, with an adjusted P-value of < 0.05 **(Figure 1B)**. Genes upregulated in  
169 both USP22 KO clones (#16 and #62) compared to control (non-human target: NHT)  
170 HT-29 cells include genes that encode for proteins involved in growth and  
171 differentiation, like Transforming Growth Factor  $\beta$ -1 (TGFB1), Tumor-associated  
172 calcium signal transducer 2 (TACSTD2) and Tyrosine-protein kinase Mer (MERTK)



173 and the cytosolic RNA- and DNA sensor DExD/H-Box Helicase 60 (DDX60).  
174 Downregulated genes include USP22, mitochondrial adenylate kinase 4 (AK4) that is  
175 involved in the regulation of mitochondrial function and ATP production <sup>58</sup> and  
176 regenerating islet-derived protein 4 (REG4), a carbohydrate-binding lectin that has  
177 been identified as marker for deep crypt secretory cells (DSCs) that acts as niche for  
178 Lgr5-positive stem cells in the colon <sup>59</sup>. Differential regulation of gene expression, as  
179 well as loss of USP22 expression, was also demonstrated by independent qRT-PCR  
180 of the USP22-dependent upregulated genes TGFB1, SLFN5, TGM2 and DDX60, as  
181 well as downregulation of USP22, CXCR4 and AK4 (**Figure 1C**), confirming the quality  
182 of the microarray.

183

184 ***Loss of USP22 specifically enriches for genes involved in interferon signaling***  
185 ***and response to viral infection***

186 Next, gene-set enrichment analysis was performed on USP22-regulated genes to  
187 investigate if certain gene sets from gene ontology (GO) are specifically regulated by  
188 USP22. Interestingly, GO analysis revealed an enrichment of genes linked to type I  
189 and II interferon (IFN) signaling, as well as regulation of viral genome replication and  
190 several other viral processes, such as the regulation of viral genome replication,  
191 response to virus, response to IFN- $\gamma$ , IFN- $\gamma$  mediated signaling pathway in USP22 KO  
192 HT-29 cells as compared to control NHT HT-29 cells (**Figure 2A**). Interestingly, the  
193 GO terms of genes that are strongly downregulated are enriched in mitochondrial  
194 translation and gene expression, ribosomal and ribonucleoprotein complex biogenesis  
195 and the processing of tRNA, rRNA and ncRNA (**Figure 2A**).

196

197 Since previous studies suggest controversial roles of USP22 in IFN signaling <sup>55,56,60,61</sup>,  
198 we decided to further study USP22-dependent changes in genes involved in type I or

199 type II IFN signaling (**Figure 2B**). Loss of USP22 leads to the upregulation of many  
200 IFN stimulated genes (ISGs), some with important functions in viral defense, like  
201 OAS1, -2 and -3, MX1 and IFI27, suggesting a potential role of USP22 in the regulation  
202 of interferon signaling and viral responses (**Figure 2B**). Among the upregulated genes  
203 were components of the ISGylation machinery, like the ubiquitin-like modifier ISG15  
204 and the ISG15-specific DUB USP18<sup>62</sup>. To validate the USP22-regulated changes in  
205 gene expression, qRT-PCR confirmed the increased expression of several ISGs, like  
206 BST2, PARP9, USP18, OAS3, IFIT1, IRF9, ISG15, OAS2, IFI27 and IFI6 in two  
207 independent HT-29 USP22 KO clones (**Figure 2C**). In addition, increased protein  
208 expression of MX1, IRF9, ISG56 and ISG20 could also be confirmed upon loss of  
209 USP22 (**Figure 2D**). These findings suggest that USP22 specifically controls the  
210 expression of genes involved in IFN signaling and virus defense, even in the absence  
211 of exogenous IFN stimulation or virus infection.

212

### 213 ***USP22 negatively regulates STAT1 signaling and IFN- $\lambda$ 1 expression***

214 The expression of ISGs is typically induced upon activation of IFN signaling pathways  
215 during pathogen invasion or autoinflammatory disease and serves to control  
216 inflammation and other defensive mechanisms<sup>9</sup>. Additionally, several IFNs are  
217 constitutively expressed at low levels as well<sup>63</sup> to prime and increase cellular  
218 responsiveness of IFN signaling upon activation by external stimuli<sup>23</sup>. Interestingly, the  
219 expression levels of pan-IFN- $\alpha$  and IFN- $\beta$  mRNA were upregulated upon loss of  
220 USP22, compared to non-human target control HT-29 (**Figure 3A**). This was  
221 accompanied by an increase in the expression of STAT1, an IFN-regulated ISG itself  
222<sup>64</sup> as well as STAT1 phosphorylation, suggesting activation of IFN signaling pathways  
223 in USP22 KO HT-29 cells, compared to control cells (**Figure 3B**). Interestingly, in  
224 contrast to mRNA levels, in-depth analysis of USP22-mediated alterations in the

225 secretion of IFNs and IFN-related cytokines revealed only low basal levels of secreted  
226 IFN- $\alpha$  and IFN- $\beta$ , suggesting that these cytokines might only weakly contribute to the  
227 observed ISG signature (**Figure 3C**). Surprisingly, the secretion and expression of IFN-  
228  $\lambda$ 1, a type III IFN, was strongly upregulated in USP22 KO HT-29 cells compared to  
229 control cells (**Figure 3C & D**). In addition, loss of USP22 expression also induced  
230 elevated basal secretion of the pro-inflammatory cytokines CXCL10 and IL-8 and minor  
231 changes in the secretion of IFN- $\alpha$ 2 and GM-CSF, compared to controls. (**Figure 3C**).  
232 These findings suggest that USP22 negatively regulates IFN- $\lambda$ 1 expression and ISG  
233 induction. Since type III IFN-induced target genes largely overlap with genes regulated  
234 by type I IFNs<sup>65,66</sup>, type III IFN is likely the main IFN contributing to the USP22-  
235 dependent induction of ISG expression and STAT1 activation.

236

### 237 ***USP22 regulates type III IFN signaling via STING***

238 Loss of USP22 expression specifically upregulates genes involved in IFN and viral  
239 responses. Within the context of viral infections, viral PAMPs, such as viral dsRNA and  
240 dsDNA are sensed by PRRs, like RIG-I, MDA5 and TLR3, and PRR activation  
241 mediates strong expression of IFNs and ISGs<sup>2,5,10</sup>. Loss of USP22 leads to increased  
242 expression of RIG-I, MDA5 and TLR3 (**Figure 4A**). To investigate if these PRRs are  
243 functionally involved in USP22-mediated increased ISG signaling, the expression of  
244 RIG-I/DDX58, MDA5/IFIH1 and TLR3 was ablated with CRISPR/Cas9 in NHT and  
245 USP22 KO HT-29 cells (**Figure 4B - D**). Interestingly, despite efficient KO of the  
246 individual PRRs in both NHT and USP22 KO HT-29 cells, additional deletion of RIG-I,  
247 MDA5 or TLR3 did not decrease USP22-dependent STAT1 phosphorylation or ISG56  
248 expression (**Figure 4B - D**). Interestingly, USP22-TLR3 double knockout (dKO) HT-29  
249 cells even exhibit an increase in phosphorylated and total STAT1 levels as well as  
250 ISG56 expression, suggesting potential TLR3-specific effects of USP22 (**Figure 4D**).

251

252 An alternative source of IFN production might be from PRR-mediated detection of self-

253 DNA (e.g. DNA damage and DNA double strand breaks), leading to the induction of

254 IFN- $\alpha$  and IFN- $\lambda$  via NF- $\kappa$ B signaling <sup>67</sup>, as observed in several types of cancer. This

255 is of special interest since USP22, apart from its role in transcriptional regulation, has

256 also been associated with DNA damage responses <sup>68</sup> and V(D)J recombination and

257 CSR *in vivo* by facilitating c-NHEJ <sup>69</sup>. Since CRISPR/Cas9-mediated loss of USP22

258 did not lead to increased  $\gamma$ H2AX levels in hIECs compared to controls (**Supplemental**

259 **Figure 2A**) despite increased NF- $\kappa$ B signaling (**Supplemental Figure 2B**), it seems

260 unlikely that DNA damage caused by loss of USP22 might contribute to IFN signaling.

261

262 Loss of RIG-I, MDA5 and TLR3 did not reverse the USP22-dependent IFN signature,

263 suggesting that either functional redundancy between the selected PRRs could

264 compensate for loss of individual PRRs or that additional PRRs are involved.

265 Interestingly, expression of STING/TMEM173 was also increased in USP22 KO HT-

266 29 cells (**Figure 4E and Supplemental Figure 2C**). STING can be activated via cGAS

267 or indirectly via RIG-1 and MDA5, leading to complex formation with TBK1 and

268 activation of IFN and NF- $\kappa$ B signaling <sup>5-8</sup>. To further investigate the potential PRR

269 redundancy and the involvement of STING, NHT and USP22 KO HT-29 cells were

270 stimulated with the TLR3-, RIG-I- and MDA5-agonist polyinosinic:polycytidylic acid

271 (poly(I:C)), or the 45-bp non-CpG oligomer IFN-stimulating DNA (ISD) from *Listeria*

272 *monocytogenes* that strongly activates the STING-TBK1-IRF3 axis <sup>70,71</sup>. Intriguingly,

273 whereas poly(I:C) induced a prominent increase in the levels of total and

274 phosphorylated STAT1 in both NHT and USP22 KO cells, ISD selectively induced

275 increases in total and phosphorylated STAT1 levels in USP22 KO cells, but not in NHT

276 control cells, which was also reflected in a prominent ISD-mediated induction of RIG-I

277 expression and STING activation (**Figure 4E**). In addition, ISD also induced strong  
278 expression of the representative ISGs OAS3 and IRF9 in USP22 KO cells compared  
279 to controls (**Figure 4F**). To confirm the role of STING in USP22-induced type III IFN  
280 signaling, USP22-STING dKO HT-29 cells were generated (**Figure 4G**). USP22-  
281 STING dKO cells exhibit strikingly reduced levels of basal and phosphorylated STAT1  
282 protein compared to USP22 KO HT-29 cells (**Figure 4G**), suggesting a STING-  
283 dependent rescue of the USP22-dependent IFN signature. In line with this, USP22-  
284 induced ISG expression could be reversed as well in USP22-STING dKO HT-29 cells  
285 (**Figure 4H**). Additionally, USP22-mediated increases in IFN- $\lambda$  expression could also  
286 largely be reduced upon USP22 STING dKO, whereas expression of IFN- $\alpha$  and IFN- $\beta$   
287 largely remains unaffected (**Figure 4I**). These findings reveal an important role of  
288 USP22 as negative regulator of STING-dependent type III IFN signaling in hIECs.

289

### 290 ***USP22 negatively regulates STING activation and ubiquitination***

291 The differential response to ISD, but not poly(I:C), and the reversal of the IFN signature  
292 in USP22-STING dKO hIECs suggests an important role of USP22 in the control of  
293 STING-induced type III IFN signaling. However, until now, the mechanisms of how  
294 USP22 regulates STING function remain unclear. Therefore, we subjected HT-29  
295 control and USP22 KO cells to the STING agonist 2'3'-cGAMP and observed a fast,  
296 strong and more prolonged activation and phosphorylation of STING, as well as  
297 increased TBK1 and IRF3 phosphorylation (**Figure 5A**). In addition, the analysis of  
298 2'3'-cGAMP-treated USP22 KO HT-29 cells revealed a very prominent increase in  
299 IFNL1 expression in USP22 KO cells, accompanied by increased IFNA and IFNB  
300 expression as well, but to a much lesser extent (**Figure 5B**).

301

302 Since STING expression is controlled by IFNs, constitutive IFN-mediated priming upon  
303 USP22 deficiency might underly the upregulation of STING. To investigate the  
304 relevance of auto- and paracrine IFN signaling in the regulation of STING expression,  
305 control and USP22 KO HT-29 cells were incubated with the JAK/STAT inhibitor  
306 ruxolitinib. JAK/STAT inhibition increased STING protein and mRNA expression levels  
307 in USP22 KO cells, compared to controls, suggesting that IFN-dependent auto- or  
308 paracrine activation of STING expression is unlikely (**Figure 5C and Supplemental**  
309 **Figure 3A**). Of note, USP22-mediated increases in STAT1 phosphorylation could be  
310 reversed with ruxolitinib (**Figure 5C**).

311  
312 STING is reported to be modified with several types of ubiquitin chains that mediate  
313 context dependent effects, ranging from proteasomal degradation to the stimulation of  
314 signaling functions. STING protein levels were slightly stabilized in cycloheximide  
315 (CHX)-treated USP22 KO HT-29 cells compared to controls (**Figure 5D**). In line with  
316 these observations, basal and 2'3'-cGAMP-induced STING ubiquitination was also  
317 increased in USP22 KO HT-29 cells, compared to NHT control cells (**Figure 5E**).  
318 Together, these findings suggest that USP22-mediated effects on type III IFN might be  
319 predominantly regulated by activating STING ubiquitination and lesser through auto-  
320 or paracrine IFN signaling.

321  
322 ***Loss of USP22 protects against SARS-CoV-2 infection, replication and de novo***  
323 ***infectious virus production in a STING-dependent manner***

324 Previous studies revealed important, but highly context-dependent roles of STING and  
325 type III IFNs in the control of SARS-CoV-2 infection <sup>19,30,32,33</sup>. In addition, USP22 has  
326 been linked to viral signaling <sup>56</sup>. To investigate the significance of USP22 and the

327 resulting STING-mediated upregulation of type III IFN and ISG signaling for viral  
328 defense, the role of the USP22-STING axis was tested during SARS-CoV-2 infection.  
329 For this, we generated control and USP22 KO Caco-2 cells that express the virus  
330 receptors ACE-2 and TMPRSS2 and are susceptible to infection with SARS-CoV-2  
331 virus <sup>19</sup>. Loss of USP22 expression in Caco-2 cells triggered phosphorylation of STAT1  
332 and increased expression of STING, compared to wild-type (WT) and NHT  
333 CRISPR/Cas9 control Caco-2 cells (**Figure 6A**). Increased USP22-dependent  
334 upregulation of IFN signaling in Caco-2 cells was also reflected in the increased  
335 expression of the antiviral ISGs IRF9 and OAS3 (**Figure 6B**). Intriguingly, USP22-  
336 deficient Caco-2 cells also express higher levels of IFN- $\lambda$ 1, compared to wild-type and  
337 CRISPR/Cas9 control non-human target cells, whereas IFN- $\alpha$  and IFN- $\beta$  expression  
338 largely remained unaffected (**Supplemental Figure 4A**).

339  
340 To test the functional relevance of the increased antiviral signaling upon loss of USP22  
341 expression, WT, NHT and USP22 KO Caco-2 cells were subjected to infection with  
342 SARS-CoV-2 particles at a MOI of 1. Infected Caco-2 cells were fixed at 24 hours post  
343 infection (hpi) and subjected to quantification of SARS-CoV-2 replication via  
344 immunofluorescence with the NP antibody recognizing SARS nucleocapsid protein.  
345 Interestingly, USP22-deficient cells displayed a prominent decrease in SARS-CoV-2  
346 infection compared to infected WT or NHT Caco-2 cells (**Figure 6C**), as determined by  
347 immunofluorescence of viral protein. In addition, 6 and 24 hpi, SARS-CoV-2-infected  
348 USP22-deficient Caco-2 cells had lower genome copy numbers, compared to WT and  
349 NHT control cells (**Figure 6D**). These findings agree with a decreased release of *de*  
350 *novo* infectious SARS-CoV-2 viral particles in supernatants of USP22 KO Caco-2 cells  
351 compared to WT and NHT Caco-2 cells (**Supplemental Figure 4B**). Intriguingly,  
352 USP22-STING dKO hIECs exhibit higher SARS-CoV-2 replication rates as well as the

353 formation of more *de novo* infectious viral particles compared to USP22 KO hIECs  
354 confirming that the USP22-STING connection also affects antiviral defense against  
355 SARS-CoV-2 infection (**Figure 6E & F and Supplemental Figure 4C**). Together,  
356 these findings indicate that USP22 critically controls SARS-CoV-2 infection, replication  
357 and the generation of novel infectious viral particles, partially through STING.



## 358 **Discussion**

359 Carefully controlled regulation of IFN secretion and signaling is essential for organizing  
360 innate immunity, inflammation and anti-viral defense and deregulation of IFNs occur in  
361 auto-inflammatory diseases and cancer <sup>1,2</sup>. Type I, II and III IFNs elicit complex and  
362 intertwined JAK/STAT-based signaling pathways that regulate the expression of IFN  
363 stimulated genes (ISG), IFNs, STATs and IRFs with important implications for anti-viral  
364 signaling <sup>9,10</sup>. Additionally, IFN responsiveness is heavily influenced by IFN receptor  
365 affinities, expression and assembly and positive and negative regulation via ISGs,  
366 often in cell- and organ-specific manners <sup>9</sup>. IFN signaling, ISG function and PRR-  
367 mediated antiviral defense is carefully controlled by ubiquitination and multiple  
368 deubiquitinating enzymes (DUBs) have been linked to the regulation of IFN-specific  
369 JAK/STAT pathways and response to viral infection <sup>38</sup>.

370

371 Apart from studying USP22 functions on interferon signaling in mouse models <sup>60</sup>,  
372 previous findings exclusively investigate cellular functions of USP22 upon virus  
373 infection and applied overexpression models to investigate USP22 interactions and  
374 USP22-mediated ubiquitination <sup>55,56</sup>. Here, we are the first to study the basal functions  
375 of USP22 in the regulation of ISG expression and STAT signaling in native human  
376 intestinal epithelial cells (hIECs). We identify USP22 as negative regulator of type III  
377 IFN secretion in basal settings without the addition of exogenous IFNs or by viral  
378 infection. Our findings reveal that USP22 regulates both basal and 2'3'-cGAMP-  
379 induced STING ubiquitination and activation, even in the absence of ectopic IFNs or  
380 viral infection, and loss of STING expression reverses the effects of USP22 KO on IFN  
381 signaling. Finally, we test the functional relevance of basal USP22- and STING-  
382 mediated IFN and JAK/STAT priming on SARS-CoV-2 infection and identify a critical

383 role of USP22 in the control of SARS-CoV-2 infection, replication and *de novo*  
384 formation of infectious viral particles, in a STING-dependent manner.

385

386 Despite the finding that USP22 regulates ISG expression in hIECs, USP22 does not  
387 exclusively control ISG or IFN-related gene expression. Hence, a large fraction of IFN-  
388 unrelated genes is changed while the expression of other genes is not altered upon  
389 loss of USP22 expression. Until now, the basis for this selectivity remains unclear. In  
390 agreement with previous observations <sup>50,72</sup>, loss of USP22 expression in hIECs indeed  
391 increased H2Bub1, a hallmark of transcriptionally active chromatin <sup>73-75</sup>. Interestingly,  
392 increased H2Bub1 could also be detected at nucleosomes at ISG-coding genes upon  
393 specific deletion of USP22 in the murine hematopoietic system, underlying the  
394 upregulation of ISG expression <sup>60</sup>. This was accompanied by alterations in  
395 hematopoietic stem cells (HSCs), myelopoiesis, B cell development, T cell activation,  
396 the numbers of B and plasma cells, serum immunoglobulin levels and the appearance  
397 of autoantibodies, but not with an increased systemic secretion of IFNs <sup>60</sup>. This is  
398 surprising since IFNs themselves are ISGs as well and IFN expression levels are often  
399 maintained at low basal levels to serve as priming signals that allow a fast and  
400 adequate increase of IFN responses upon virus infection. Indeed, a large fraction of  
401 USP22-regulated ISGs has been demonstrated to be involved as important anti-SARS-  
402 CoV-2 countermeasures <sup>76</sup>. In addition, global and ISG-specific levels of H2Bub1 can  
403 be regulated by type I IFN signaling during infection with human adenovirus as well, in  
404 a manner depending on human Bre1/RNF20 and the viral E1A protein <sup>77</sup>. Intriguingly,  
405 the RNF20/RNF40 E3 ligase complex, responsible for H2B ubiquitination <sup>78</sup>, was  
406 shown to protect against SARS-CoV-2 infection, and RNF20 becomes cleaved and  
407 inactivated by the SARS-CoV-2 protease 3CLpro <sup>79</sup>. At present, the functional role of  
408 3CLpro-mediated inactivation of RNF20 for H2Bub1 still remains to be addressed.

409

410 Since loss of USP22 mostly affects type III IFN expression and secretion, USP22 likely  
411 mediates ISG expression both via epigenetic regulatory mechanisms as well as  
412 through long-term IFN-mediated priming effects in hIECs. In contrast to type I IFN, type  
413 III IFN is mostly sensed in gastro-intestinal and airway epithelia and in the blood-brain  
414 barrier <sup>6-8,11,65</sup>. IFN- $\lambda$  mostly exhibits long-term signaling effects and plays important  
415 roles in SARS-CoV-2 infection in airway epithelial and gastro-intestinal cells and  
416 organoids and has been shown to critically control antiviral defense <sup>19,25-29</sup>.

417

418 The susceptibility towards SARS-CoV-2-infections is determined by USP22-mediated  
419 regulation of STING. STING is described as mediator of IFN- $\lambda$ 1 production in HT-29  
420 cells, and during viral infection in primary human macrophages in a Ku70-dependent  
421 manner <sup>80,81</sup>. We furthermore demonstrate for the first time that in the absence of viral  
422 infections or exogenous IFN, loss of USP22 expression resulted in basal and 2'3'-  
423 cGAMP-induced STING ubiquitination in hIECs. In addition, loss of STING expression  
424 decreased the IFN/ISG signaling that occurred under USP22 deficiency, suggesting  
425 that STING acts as a physical scaffold for USP22-dependent ubiquitin modifications.  
426 STING ubiquitination serves different physiological roles, including determining protein  
427 stability, mediating protein-protein interactions and cellular localization <sup>39-48</sup>. Recently,  
428 cGAS-STING activity has emerged as regulator of immunopathology in COVID-19,  
429 highlighting the relevant of STING regulation <sup>82</sup>. STING ubiquitination enables the  
430 STING-TBK1 interaction upon cGAS-mediated recognition of cytosolic DNA and is  
431 generally associated with activation of ISG expression <sup>72</sup>. Until now, USP22-mediated  
432 STING ubiquitination has only been described upon viral infection and upon ectopic  
433 overexpression. For example, overexpressed USP22 modifies ectopically expressed  
434 STING with HA-tagged K27 ubiquitin upon HSV-1 infection in HEK293T cells <sup>56</sup>.

435 USP22 controls nuclear accumulation of IRF3 and type I IFN signaling through KPNA2  
436 deubiquitination only upon infection with SeV and HSV-1 and loss of USP22  
437 expression decreased type I IFN responses upon virus infection, while USP22 deletion  
438 in uninfected cells did not trigger basal IFN signaling <sup>55</sup>. At present, the role of type III  
439 IFNs in SeV and HSV-1 infections remains unclear.

440

441 Taken together, our findings identify USP22 as central host factor that determines ISG  
442 expression and type III IFN production via STING, with important implications for  
443 SARS-CoV-2 infection and IFN priming.

444

## 445 **Materials and Methods**

### 446 ***Cell culture, reagents and chemicals***

447 The human colon carcinoma cell line HT-29 was obtained from DSMZ (Braunschweig,  
448 Germany) and cultivated in McCoy's 5A Medium GlutaMAX™-I (Life Technologies,  
449 Inc., Eggenstein, Germany), supplemented with 10 % fetal calf serum (FCS)  
450 (Biochrom, Ltd., Berlin, Germany) and 1 % penicillin-streptomycin (Invitrogen). The  
451 human colorectal adenocarcinoma cell line Caco-2 was provided by Jindrich Cinatl Jr.  
452 (Frankfurt am Main, Germany) and maintained in MEM medium (Sigma),  
453 supplemented with 10 % FCS, 1 % penicillin-streptomycin, 2 % L-glutamine (Gibco).  
454 HEK293T cells were cultivated in Dulbecco's modified Eagle's medium (DMEM)  
455 supplemented with 10 % FCS and 1 % penicillin/streptomycin. Vero E6 African green  
456 monkey kidney cells were obtained from ATCC and maintained in DMEM  
457 supplemented with 10 % FCS and 1 % penicillin/streptomycin. Cell lines were  
458 cultivated in humidified atmosphere at 37 °C with 5 % CO<sub>2</sub> and sub-culturing of cells  
459 was performed two or three times a week. All cell lines were regularly negatively tested  
460 for mycoplasma.

461  
462 IFN-stimulating DNA (ISD), the cationic lipid-based transfection reagent LyoVec and  
463 cyclic [G(2',5')pA(3',5')p] (2'3'-cGAMP) were obtained from Invivogen (San Diego,  
464 USA) and Lipofectamine2000 was obtained from ThermoFisher Scientific (Dreieich,  
465 Germany). All other chemicals were obtained from Carl Roth (Karlsruhe, Germany) or  
466 Sigma, unless stated otherwise.

467

### 468 ***CRISPR/Cas9 gene editing***

469 CRISPR/Cas9 KO cells were generated as described previously<sup>54</sup>. Briefly, three  
470 independent guide RNAs (gRNAs), targeting USP22 (#1:

471 GCCATTGATCTGATGTACGG, #2: CCTCGAACTGCACCATAGGT and #3:  
472 ACCTGGTGTGGACCCACGCG), TMEM173 (#1: CATTACAACAACCTGCTACG, #2:  
473 GCTGGGACTGCTGTAAACG, #3: GCAGGCACTCAGCAGAACCA), DDX58 (#1:  
474 CATCTTAAAAAATTCCCACA, #2: GGAACAAGTTCAGTGAAGT, #3:  
475 TGCATGCTCACTGATAATGA), IFIH1 (#1: CTTGGACATAACAGCAACAT, #2:  
476 TGAGTTCCAAAATCTGACAT) or TLR3 (#1: ACGACTGATGCTCCGAAGGG, #2:  
477 ACTTACCTTCTGCTTGACAA, #3: GGAAATAAATGGGACCACCA) and control  
478 gRNAs (Addgene plasmid #51763, #51762 and #51760) were ligated into  
479 pLentiCRISPRv2 (Addgene plasmid # 52961) using restriction cloning. Plasmid fidelity  
480 was confirmed using Sanger sequencing. For the generation of viral particles, multiple  
481 gene-specific gRNAs were combined and co-transfected with pMD2.G (Addgene  
482 plasmid #12259) and psPAX2 (Addgene plasmid #12260) in HEK293T cells using  
483 FuGENE HD Transfection Reagent (Promega), according to the manufacturer's  
484 protocol. Viral supernatants were collected 48- and 72-hours post-transfection, pooled  
485 and used for transduction in the presence of Polybrene (Sigma-Aldrich), followed by  
486 selection with puromycin (Thermo Fischer Scientific). Knockout was confirmed with  
487 Western blotting. Where necessary, single-cell clones were selected using limited  
488 dilution. Double-knockout (dKO) cells were generated by transduction with USP22-  
489 targeting virus first, followed by transduction with viral particles with gRNAs against the  
490 appropriate secondary targets and puromycin selection.

491

#### 492 ***RNA isolation, cDNA synthesis and quantitative real-time PCR***

493 Appropriate cell lines were seeded in 6-well plates (Greiner) 48 hours prior to RNA  
494 isolation, treated as indicated or left untreated, followed by extraction of total RNA  
495 using the peqGOLD total RNA isolation kit (Peqlab, Erlangen, Germany), according to  
496 the manufacturer's protocol. In brief, cells were lysed in RNA lysis buffer, centrifuged

497 at 12000 x g for 2 min., followed by the addition of an equal volume of 70 % ethanol to  
498 the flow-through, after which RNA was bound to RNA-binding columns by  
499 centrifugation at 10000 x g for 1 min. Upon washing with RNA Wash Buffer I and two  
500 additional wash steps with 80 % ethanol, the column was dried by centrifuging at 12000  
501 x g for 2 min. RNA was eluted with nuclease free water at 12000 x g for 2 min after  
502 which 1 µg of RNA was transcribed into cDNA using the RevertAid H Minus First Strand  
503 Kit (ThermoFisher Scientific) and random primers, according to the manufacturer's  
504 protocol. Relative mRNA expression levels were quantified using SYBR green-based  
505 quantitative real-time PCR (Applied Biosystems, Darmstadt, Germany) using the  
506 7900GR fast real-time PCR system (Applied Biosystems). Data were normalized to  
507 28S housekeeping expression and the relative expression of target gene transcripts  
508 levels were calculated compared to the reference transcript using the  $\Delta\Delta CT$  method  
509 <sup>83</sup>. At least three independent experiments in duplicates are shown. All primers were  
510 purchased at Eurofins (Hamburg, Germany). Primer sequences are shown in  
511 **Supplementary Table 1.**

512

### 513 ***Gene expression profiling***

514 To quantify global changes in gene expression, RNA was isolated as described above,  
515 followed by a DNase digest upon RNA binding using the peqGOLD DNase Digest Kit,  
516 according to the manufacturer's instructions. Samples were processed and gene  
517 expression was profiled at the DKFZ Genomics and Proteomics Core Facility  
518 (Heidelberg, Germany) using the Affymetrix human Clariom S array.

519

### 520 ***Gene expression profiling analysis***

521 Raw .CEL files were processed with the oligo R package <sup>84</sup> and the normalized  
522 intensities were obtained after RMA normalization. Genes with differential expression

523 between NHT control and USP22 KO have been identified using the linear model-  
524 based approach limma R package <sup>85</sup>. An adjusted P-value < 0.05 was considered  
525 significant. Gene-set enrichment analysis was performed with gage R package <sup>86</sup> using  
526 the MSigDB <sup>87</sup> as gene set repository. An adjusted P-value < 0.05 was considered  
527 significant.

528

### 529 ***Multiplex quantification of cytokine secretion***

530 Cells were seeded in 2 ml cell culture medium and supernatant was collected after 66  
531 h, centrifuged at 300 x g, 4 °C for 5 min. and frozen in liquid nitrogen. Samples were  
532 analyzed using the LEGENDplex™ Human Anti-Virus Response Panel multiplex assay  
533 (BioLegend, San Diego, CA, USA) following the manufacturer's protocol. The analysis  
534 was performed with the BD FACSVerse™ flow cytometer (BD Biosciences, San Jose,  
535 CA, USA). At least 300 events were acquired per analyte. The data was analyzed with  
536 the LEGENDplex v.8 software (BioLegend).

537

### 538 ***Western Blot analysis***

539 The indicated cell lines were seeded two days before lysis and treated as indicated, or  
540 left untreated. Lysis was done on ice using RIPA lysis buffer (50 mM Tris-HCl pH 8,  
541 150 mM NaCl, 1 % Nonidet P-40 (NP-40), 150 mM MgCl<sub>2</sub>, 0.5 % sodium  
542 deoxycholate), with phosphatase inhibitors (1 mM sodium orthovanadate, 1 mM β-  
543 glycerophosphate, 5 mM sodium fluoride), protease inhibitor cocktail (Roche,  
544 Grenzach, Germany), 0.1 % sodium dodecyl sulfate (SDS) and Pierce Universal  
545 Nuclease (Thermo Fisher Scientific) for 30 min, followed by centrifugation at 18000 x  
546 g for 25 min. at 4 °C. Protein concentrations of the cell lysates were measured using  
547 the BCA Protein Assay Kit from Pierce™, according to the manufacturer's instructions.



548 For Western blot detection, 20-40  $\mu$ g of the lysates were boiled in Laemmli loading  
549 buffer (6x Laemmli: 360 nM Tris Base pH 6.8, 30 % glycerol, 120 mg/ml SDS, 93 mg/ml  
550 dithiothreitol (DTT), 12 mg/ml bromophenol blue) at 95 °C for 5 min, followed by  
551 Western blot analysis. The following antibodies are used: rabbit anti-STING (13647S,  
552 Cell Signaling Beverly, MA, USA), rabbit anti-phospho-STAT1 (9167L, Cell Signaling),  
553 mouse anti-STAT1 (9176S, Cell signaling), rabbit anti-USP22 (#ab195298, Abcam),  
554 mouse anti-glyceraldehyde 3-phosphate dehydrogenase (GAPDH) (5G4cc, HyTest,  
555 Turku, Finland), mouse anti-Vinculin (#V9131-100UL, Merck), rabbit anti-TBK1  
556 (ab40676, Abcam), rabbit anti-phospho-TBK1 (ab109272, Abcam), rabbit anti-Histone  
557 H2B (#07-371, Merck), mouse anti-Ubiquityl-Histone H2B (#05-1312, Merck), rabbit  
558 anti-p65 (sc-372X, Santa Cruz Biotechnologies, Santa Cruz, CA, USA), rabbit anti-  
559 phospho-p65 (3033S, Cell Signaling), mouse anti-IRF3 (sc-33641, Santa Cruz), rabbit  
560 anti-phospho-IRF3 (4947S, Cell Signaling), rabbit anti-RIG-I (3743S, Cell Signaling),  
561 rabbit anti-MDA5 (5321S, Cell Signaling), rabbit anti-TLR3 (6961S, Cell Signaling),  
562 mouse anti-ISG56 (PA3-848, Thermo scientific), rabbit anti-MX1 (37849S, Cell  
563 Signaling), rabbit anti-IRF9 (76684S, Cell Signaling), rabbit anti-ISG20 (PA5-30073,  
564 Thermo scientific), rabbit anti- $\gamma$ -H2AX (phospho Ser139) (NB100-384, Novus  
565 Biologicals) and mouse anti-NF- $\kappa$ B p52 (05-361, Millipore). Secondary antibodies  
566 labeled with horseradish peroxidase (HRP) were used for detection with enhanced  
567 chemiluminescence (Amersham Bioscience, Freiburg, Germany). HRP-conjugated  
568 goat anti-mouse IgG (ab6789, Abcam) was diluted 1:10000 and HRP-conjugated goat  
569 anti-rabbit IgG (ab6721, Abcam) was diluted 1:30000 in 5 % milk powder in PBS with  
570 0.2 % Tween 20 (PBS-T). When necessary, membranes were stripped using 0.4 M  
571 NaOH for 10 min, followed by 1 h of blocking and incubation with a second primary  
572 antibody. Representative blots of at least two independent experiments are shown.  
573 When detected on separate membranes, only one representative loading control is

574 shown for clarity.

575

### 576 ***Stimulation of STING with 2'3'-cGAMP***

577 The indicated cell lines were seeded 24 or 48 hours prior to stimulation in P/S-free cell  
578 culture medium. For stimulation, culture medium was removed and cell lines were  
579 permeabilized by incubation with digitonin buffer (50 mM HEPES, 100 mM KCl, 3 mM  
580 MgCl<sub>2</sub>, 0.1 mM dithiothreitol, 85 mM sucrose, 0.2 % bovine serum albumin, 1 mM ATP,  
581 5 µg/ml Digitonin) pH 7 in the presence or absence of 10 µg/ml 2'3'-cGAMP for 10 min.  
582 at 37 °C. After incubation, the permeabilization buffer was replaced with P/S-free cell  
583 culture medium and further incubated at 37 °C/5 % CO<sub>2</sub> for the indicated time points.

584

### 585 ***PRR stimulation with poly(I:C) and ISD***

586 The indicated HT-29 cells were seeded 24 hours prior to treatment in sterile 6-well  
587 plates (Greiner). For each well, two µg of ISD (Invivogen) were pre-mixed with  
588 OptiMEM and, after 5 min. incubation at room temperature, mixed with premixed  
589 Lipofectamine2000-OptiMEM at a ratio of 3:1, according to the manufacturer's  
590 instructions. After incubation for 15 min. at room temperature, the indicated  
591 transfection mixes were added to the cells in P/S free medium. Cell lysis with RIPA or  
592 RNA lysis buffer was performed after 24 h. For stimulation with poly(I:C), the indicated  
593 HT-29 cells were seeded as described above and for each well, 2 µg of poly(I:C) was  
594 mixed with 20 µl LyoVec (Invivogen), incubated for 15 min. at room temperature to  
595 allow the formation of lipid-RNA complexes. The transfection mix was then added to  
596 the indicated HT-29 cells in P/S free medium at a 1:20 volume ratio and incubated for  
597 24 h, after which cells were processed for Western blot or RNA isolation.

598

### 599 ***Tandem Ubiquitin Binding Entity (TUBE) pull-down analysis***

600 Ubiquitinated proteins were enriched using GST-tagged tandem-repeated ubiquitin-  
601 binding entities (TUBEs)<sup>88</sup>, as described before<sup>54</sup>. Briefly, the indicated cell lines were  
602 seeded 48 hours prior to lysis and/or treatment, harvested in NP-40 lysis buffer (50  
603 mM NaCl, 20 mM Tris pH 7.5, 1 % NP-40, 5 mM EDTA, 10 % Glycerol) supplemented  
604 with 25 mM NEM, 1 mM sodium orthovanadate, 1 mM sodium fluoride, 0.5 mM  
605 phenylmethylsulfonyl fluoride, protease inhibitor cocktail and Pierce Universal  
606 Nuclease on ice for 30 min. GST-TUBE beads were washed once with NP-40 buffer  
607 and incubated with 3 mg of protein lysate over night at 4 °C. Beads were washed four  
608 times with NP-40 buffer, followed by elution of ubiquitinated proteins by boiling in 2x  
609 Laemmli loading buffer at 96 °C for 6 min. Ubiquitinated proteins were analyzed using  
610 Western blot analysis.

611

### 612 ***SARS-CoV-2 infection***

613 SARS-CoV-2 (strain BavPat1/2020) was obtained from the European Virology Archive  
614 and amplified in Vero E6 cells and used at passage 3. Virus titers were determined by  
615 TCID50 assay. Caco-2 cells were infected using a MOI of 1 virus particle per cell.  
616 Medium was removed from Caco-2 cells and virus was added to cells for 1 h at 37°C.  
617 Viral supernatants were removed, infected cells were washed once with PBS and  
618 media was added back to the cells. Virus infection was monitored 24 h post-infection.

619

### 620 ***TCID50 virus titration***

621 Vero E6 cells were seeded (20000 per well) in 96-well plates 24 h prior to infection. A  
622 volume of 100 µl of viral supernatant from the indicated SARS-CoV-2-infected Caco-2  
623 cells was added to the first well. Seven 1:10 dilutions were made (all samples were  
624 performed in triplicate). Infections were allowed to proceed for 24 h. At 24 h post  
625 infection (hpi), cells were fixed in 2 % paraformaldehyde (PFA) for 20 minutes at room

626 temperature. PFA was removed and cells were washed twice in PBS and  
627 permeabilized for 10 min. at room temperature in 0,5 % Triton-X/PBS. Cells were  
628 blocked in a 1:2 dilution of LI-COR blocking buffer (LI-COR, Lincoln, NE, USA) for 30  
629 min at room temperature. Infected cells were stained with 1:1000 diluted anti-dsRNA  
630 (J2) for 1 h at room temperature, washed three times with 0.1 % PBT-T, followed by  
631 incubation with secondary antibody (anti-mouse CW800) and DNA dye Draq5 (Abcam,  
632 Cambridge, UK), diluted 1:10000 in blocking buffer and incubated for 1 h at room  
633 temperature. Cells were washed three times with 0.1 % PBS-T and imaged in PBS on  
634 a LI-COR imager.

635

### 636 ***Quantification of viral RNA***

637 At 24 hpi, RNA was extracted from infected or mock-treated Caco-2 cells using the  
638 Qiagen RNAeasy Plus Extraction Kit (Qiagen, Hilden, Germany). For quantifying the  
639 SARS-CoV-2 genome abundance in mock and infected samples, cDNA was generated  
640 using 250 ng of RNA with the iSCRIPT reverse transcriptase (BioRad, Hercules, CA,  
641 USA), according to the manufacturer's instructions. qRT-PCR was performed using  
642 iTaq SYBR green (BioRad) following the instructions of the manufacturer and  
643 normalized on TBP. Primers were ordered at Eurofins, Luxemburg and are listed in

644 **Supplementary Table 1.**

645

### 646 ***Indirect Immunofluorescence Assay***

647 Cells seeded on iBIDI glass bottom 8-well chamber slides. At 24 post-infection, cells  
648 were fixed in 4% paraformaldehyde (PFA) for 20 mins at room temperature (RT). Cells  
649 were washed and permeabilized in 0.5% Triton-X for 15 mins at RT. Primary antibody  
650 SARS-CoV NP (Sino biologicals MM05) were diluted in phosphate-buffered saline  
651 (PBS) and incubated for 1h at RT. Cells were washed in 1X PBS three times and

652 incubated with secondary antibodies goat-anti mouse Alexa Fluor 568 and DAPI for 45  
653 mins at RT. Cells were washed in 1X PBS three times and maintained in PBS. Cells  
654 were imaged by epifluorescence on a Nikon Eclipse Ti-S (Nikon).

655

### 656 ***Statistical analysis***

657 Significance was assessed using Student's t-test (two-tailed distribution, two-sample,  
658 equal variance) using Microsoft Excel, unless indicated otherwise. *P*-values < 0.05 are  
659 considered significant (\* *P* < 0.05; \*\* *P* < 0.01; \*\*\* *P* < 0.001, n.s.: not significant).

660

### 661 ***Resource availability***

662 Further information and requests for resources and reagents should be directed to and  
663 will be fulfilled by the corresponding author, Sjoerd J. L. van Wijk ([vanWijk@med.uni-](mailto:vanWijk@med.uni-frankfurt.de)  
664 [frankfurt.de](mailto:vanWijk@med.uni-frankfurt.de); [s.wijk@kinderkrebsstiftung-frankfurt.de](mailto:s.wijk@kinderkrebsstiftung-frankfurt.de)).

665

### 666 ***Materials availability***

667 All unique reagents generated in this study are available from the corresponding author  
668 without restriction.

669

### 670 ***Data and code availability***

671 Microarray data are available on Gene Expression Omnibus under the accession  
672 number GSE190036.

673 **Acknowledgments**

674 The authors thank the members of the van Wijk lab for advice, discussions and support  
675 during the study, Dr. M. Bewerunge-Hudler and her team from the Genomics and  
676 Proteomics Core Facility, German Cancer Research Center/DKFZ, Heidelberg,  
677 Germany for help and support with performing the microarray analysis and Christina  
678 Hugenberg for proofreading. S.J.L.v.W. is supported by the Deutsche  
679 Forschungsgemeinschaft (DFG) (WI 5171/1-1, FU 436/20-1 and project-ID 259130777  
680 – SFB 1177), the Deutsche Krebshilfe (70113680), the Frankfurter Stiftung für  
681 krebskranke Kinder and the Dr. Eberhard and Hilde Rüdiger Foundation. M.B. is  
682 supported by the DFG – CRC 850 subprojects C9 and Z1, CRC1479 (Project ID:  
683 441891347- S1), CRC 1160 (Project Z02), CRC1453 (Project ID 431984000 - S1) and  
684 TRR167 (Project Z01), the German Federal Ministry of Education and Research by  
685 MIRACUM within the Medical Informatics Funding Scheme (FKZ 01ZZ1801B). S.B.  
686 was supported by DFG project numbers 415089553 (Heisenberg program),  
687 240245660 (SFB1129), 278001972 (TRR186), and 272983813 (TRR179), the state of  
688 Baden-Württemberg (AZ: 33.7533.-6-21/5/1), the BMBF (01KI20198A) and within the  
689 Network University Medicine - Organo-Strat COVID-19. M.L.S. was supported by the  
690 BMBF (01KI20239B) and DFG project 416072091.

691

692 **Author contributions**

693 R.K. performed experiments and analyzed data with help from J.R., S.S. and L.K.,  
694 M.L.S and S.B. performed SARS-CoV-2 infections and accompanying experiments,  
695 gene expression analysis was performed by G.A. and M.B., R.S. provided access and  
696 support with the LEGENDplex analysis. D.B and J.C.Jr. provided the Caco-2 cell line

697 and expertise. R.K. and S.J.L.v.W. conceived the project and wrote the manuscript. All  
698 authors have read, commented and agreed on the submitted version of the manuscript.

699

700 **Declaration of interest**

701 The authors declare no competing interests.

702

703 **Figure legends**

704 **Figure 1: Profiling USP22-mediated gene expression in HT-29 hIECs. A.** Volcano  
705 plot showing the differential gene expression patterns of two independent single-cell  
706 HT-29 USP22 CRISPR/Cas9 KO clones (#16 and #62) compared to CRISPR/Cas9  
707 control (NHT) HT-29 cells. Color code represents the log<sub>2</sub> foldchange compared to  
708 NHT. **B.** Heatmap of the top-50 differentially regulated genes between HT-29 USP22  
709 KO single clones #16 and #62 and the NHT control. Color coding represents the row-  
710 wise scaled (Z-score) RNA intensities. Genes are sorted according to their log<sub>2</sub> fold  
711 change, compared to NHT. **C.** Basal mRNA expression levels of the indicated genes  
712 were determined in control and two independent USP22 KO HT-29 single clones using  
713 qRT-PCR. Gene expression was normalized against 28S mRNA and is presented as  
714 x-fold mRNA expression compared to NHT. Mean and SD of three independent  
715 experiments in triplicate are shown. \*P < 0.05; \*\*P < 0.01, \*\*\*P < 0.001.

716

717 **Figure 2: Loss of USP22 specifically enriches for genes involved in interferon**  
718 **signaling and response to viral infection. A.** Bar plot showing the top-20 regulated  
719 Gene Ontology (GO) terms in two independent single-cell HT-29 USP22  
720 CRISPR/Cas9 KO clones (#16 and #62) compared to control (non-human target: NHT)  
721 HT-29 cells. Color code represents the number of annotated genes within each gene  
722 set. **B.** Heatmap of differentially expressed genes contributing to the GO terms  
723 *response to type I interferon* (left) and *interferon gamma mediated signaling pathway*  
724 (right). Color code represents the log<sub>2</sub> foldchange compared to NHT. **C.** Basal mRNA  
725 expression levels of GO enriched genes related to IFN signaling in control (NHT) and  
726 two independent USP22 KO HT-29 single clones using qRT-PCR. Gene expression  
727 was normalized against 28S mRNA and is presented as x-fold mRNA expression  
728 compared to NHT. Mean and SD of three independent experiments in triplicate are



729 shown. \*P < 0.05; \*\*P < 0.01, \*\*\*P < 0.001, n.s. not significant. **D.** Western blot analysis  
730 of basal MX1, IRF9, ISG56, ISG20 and USP22 expression levels in control and USP22  
731 KO HT-29 cells (clone USP22 KO #62). GAPDH served as loading control.  
732 Representative blots of at least two different independent experiments are shown.

733

734 **Figure 3: USP22 negatively regulates STAT1 signaling and IFN- $\lambda$ 1 expression. A.**

735 Basal mRNA expression levels of total IFNA (panIFNA) and IFNB1 in control (non-  
736 human target: NHT) and the CRISPR/Cas9-generated USP22 knock-out (KO) HT-29  
737 single clone (USP22 KO #62). Gene expression was normalized against 28S mRNA  
738 and is presented as x-fold mRNA expression compared to NHT. Mean and SD of three  
739 independent experiments in triplicate are shown. \*P < 0.05; \*\*P < 0.01. **B.** Western blot  
740 analysis of basal phosphorylated and total levels of STAT1 and USP22 in control and  
741 USP22 KO HT-29 cells (USP22 KO #62). GAPDH served as loading control.  
742 Representative blots of at least two different independent experiments are shown. **C.**  
743 FACS-based analysis of the indicated basal secretion patterns of the viral defense  
744 cytokine panel in supernatants of control and USP22 KO HT-29 cells (USP22 KO #62).  
745 Data are presented as absolute levels of cytokines (in pg/ml). Samples below lower  
746 detection limit were set to zero, values above upper detection limit were set to detection  
747 limit. Mean and SD of three independent experiments in triplicate are shown. \*P < 0.05;  
748 n.s. not significant. **D.** Basal mRNA expression levels of IFNL1 in control and USP22  
749 KO HT-29 single clone (USP22 KO #62). Gene expression was normalized against  
750 28S mRNA and is presented as x-fold mRNA expression compared to NHT. Mean and  
751 SD of three independent experiments in triplicate are shown. \*P < 0.05.

752

753 **Figure 4: USP22 regulates type III IFN signaling via STING. A.** Western blot  
754 analysis of basal RIG-I, MDA5, TLR3 and USP22 expression levels in control (non-

755 human target: NHT) and the CRISPR/Cas9-generated USP22 knock-out (KO) HT-29  
756 single clone (USP22 KO #62). GAPDH served as loading control. Representative blots  
757 of at least two different independent experiments are shown. **B.** Western blot analysis  
758 of basal RIG-I, phosphorylated and total STAT1, ISG56 and USP22 expression levels  
759 in control, USP22 KO HT-29 cells (USP22 KO #62) as well as two NHT-control and  
760 one USP22-DDX58 double KO (dKO) HT-29 single clones. GAPDH served as loading  
761 control. Representative blots of at least two different independent experiments are  
762 shown. **C.** Idem as **B.**, one MDA5/IFIH1 KO single clone instead of RIG-I/DDX58. **D.**  
763 Idem as **B.** three TLR3 KO single clones instead of RIG-I/DDX58. **E.** Western blot  
764 analysis of phosphorylated and total STAT1, RIG-I, STING and USP22 expression  
765 levels in control and USP22 KO HT-29 cells (USP22 KO #62) subjected to transfection  
766 with transfection reagent (control) alone or in the presence of ISD and poly(I:C) (2  
767  $\mu\text{g}/\text{well}$ ) for 24 h. Vinculin served as loading control. Representative blots of at least  
768 two different independent experiments are shown. **F.** mRNA expression levels of OAS3  
769 (*left*) and IRF9 (*right*) in control and USP22 knock-out (KO) HT-29 cells (USP22 KO  
770 #62) subjected to transfection with ISD and poly(I:C) (each 2  $\mu\text{g}/\text{well}$ ) for 24 h. Gene  
771 expression was normalized against 28S mRNA and is presented as x-fold mRNA  
772 expression compared to NHT. Mean and SD of three independent experiments in  
773 triplicate are shown. \*P < 0.05; \*\*P < 0.01; n.s. not significant. **G.** Western blot analysis  
774 of phosphorylated and total STAT1, STING and USP22 expression levels in control,  
775 USP22 KO HT-29 cells (USP22 KO #62) as well as in the indicated NHT, USP22,  
776 control and STING dKO cells. GAPDH served as loading control. Representative blots  
777 of at least two different independent experiments are shown. **H.** Basal mRNA  
778 expression levels of the indicated genes in control USP22 KO HT-29 cells (USP22 KO  
779 #62) as well as in the indicated NHT, USP22, control and STING dKO cells. Gene  
780 expression was normalized against 28S mRNA and is presented as x-fold mRNA

781 expression compared to NHT. Mean and SD of three independent experiments in  
782 triplicate are shown. \*\*P < 0.01; \*\*\*P < 0.001. **I.** Basal mRNA expression levels of IFNA,  
783 IFNB and IFNL1 in control USP22 KO HT-29 cells (USP22 KO #62) as well as in the  
784 indicated NHT, USP22, control and STING dKO cells. Gene expression was  
785 normalized against 28S mRNA and is presented as x-fold mRNA expression compared  
786 to NHT. Mean and SD of three independent experiments in triplicate are shown. \*\*P <  
787 0.01; \*\*\*P < 0.001.

788

789 **Figure 5: USP22 negatively regulates STING activation and ubiquitination. A.**

790 Western blot analysis of STING, phosphorylated and total TBK1, phosphorylated and  
791 total IRF3 and USP22 expression levels in control (non-human target: NHT) and  
792 CRISPR/Cas9-generated USP22 knock-out (KO) HT-29 single clone (USP22 KO #62)  
793 subjected to 2'3'-cGAMP (10 µg/ml) for the indicated timepoints. GAPDH served as  
794 loading control. Representative blots of at least two different independent experiments  
795 are shown. **B.** mRNA expression levels of IFNA, IFNB and IFNL1 in control and USP22  
796 KO HT-29 cells (USP22 KO #62) subjected to 2'3'-cGAMP (10 µg/ml) for 3 h. Gene  
797 expression was normalized against 28S mRNA and is presented as x-fold mRNA  
798 expression compared to NHT. Mean and SD of three independent experiments in  
799 triplicate are shown. \*P < 0.05; \*\*P < 0.01. **C.** Western blot analysis of STING,  
800 phosphorylated and total STAT1 and USP22 expression levels in control and USP22  
801 KO HT-29 cells (USP22 KO #62) subjected to the JAK/STAT inhibitor ruxolitinib (5 µM)  
802 for the indicated timepoints. GAPDH served as loading control. Representative blots  
803 of at least two different independent experiments are shown. **D.** Western blot analysis  
804 of STING and USP22 expression levels in control and USP22 KO HT-29 cells (USP22  
805 KO #62) subjected to cycloheximide (CHX) (100 µg/ml) for the indicated timepoints.  
806 Vinculin served as loading control. Representative blots of at least two different

807 independent experiments are shown. **E.** Western blot analysis of Tandem Ubiquitin  
808 Binding Entity (TUBE)-enriched ubiquitin-modified STING from control and USP22 KO  
809 HT-29 cells (USP22 KO #62) subjected to 2'3'-cGAMP (10 µg/ml) for 24 h. GAPDH  
810 served as loading control and Ponceau S staining confirms equal loading of GST-  
811 TUBE beads. Representative blots of at least two different independent experiments  
812 are shown.

813

814 **Figure 6: Loss of USP22 protects against SARS-CoV-2 infection, replication and**  
815 **de novo infectious virus production in a STING-dependent manner. A.** Western  
816 blot analysis of phosphorylated and total STAT1, STING and USP22 expression levels  
817 in wild-type (WT), control (non-human target: NHT) and two CRISPR/Cas9-generated  
818 USP22 knock-out (KO) Caco-2 single clones (USP22 KO #1 and #6). GAPDH served  
819 as loading control. Representative blots of at least two different independent  
820 experiments are shown. **B.** Basal mRNA expression levels of IRF9 and OAS3 in WT,  
821 control and USP22 KO Caco-2 cells (USP22 KO #1 and #6). Gene expression was  
822 normalized against 28S mRNA and is presented as x-fold mRNA expression compared  
823 to NHT. Mean and SD of three independent experiments in triplicate are shown. \*P <  
824 0.05; \*\*P < 0.01, n.s. not significant. **C.** Quantification of immunofluorescence-stained  
825 SARS-CoV-2-infected cells, normalized against non-infected cells. WT, control and  
826 USP22 KO Caco-2 cells (USP22 KO #1 and #6) were stained with anti-dsRNA (J2) at  
827 24 hpi. Mean and SD of three independent experiments in triplicate are shown. \*\*\*P <  
828 0.001. **D.** Quantification of relative SARS-CoV-2 genome expression of SARS-CoV-2-  
829 infected WT, control and USP22 KO Caco-2 cells (USP22 KO #1 and #6) at 6 hpi (left)  
830 and 24 hpi (right). Data are normalized against non-infected cells. Mean and SD of  
831 three independent experiments in triplicate are shown. \*\*\*P < 0.001. **E.** Western blot  
832 analysis of STING and USP22 expression levels in control-NHT, control-USP22 KO

833 #1 and #6, STING-NHT and STING-USP22 KO #1 and #6 double KO (dKO) HT-29  
834 cells. Vinculin served as loading control. Representative blots of at least two different  
835 independent experiments are shown. **F.** Quantification of relative SARS-CoV-2  
836 genome expression of SARS-CoV-2-infected control-NHT, control-USP22 KO #1 and  
837 #6, STING-NHT and STING-USP22 KO #1 and #6 dKO HT-29 cells at 24 hpi. Mean  
838 and SD of three independent experiments in triplicate are shown. \*\*P < 0.005.  
839

840 **References**

- 841 1 Takeuchi, O. & Akira, S. Pattern recognition receptors and inflammation. *Cell*  
842 **140**, 805-820, doi:10.1016/j.cell.2010.01.022 (2010).
- 843 2 Li, D. & Wu, M. Pattern recognition receptors in health and diseases. *Signal*  
844 *Transduct Target Ther* **6**, 291, doi:10.1038/s41392-021-00687-0 (2021).
- 845 3 Pichlmair, A. & Reis e Sousa, C. Innate recognition of viruses. *Immunity* **27**,  
846 370-383, doi:10.1016/j.immuni.2007.08.012 (2007).
- 847 4 Kato, H. *et al.* Length-dependent recognition of double-stranded ribonucleic  
848 acids by retinoic acid-inducible gene-I and melanoma differentiation-associated  
849 gene 5. *The Journal of experimental medicine* **205**, 1601-1610,  
850 doi:10.1084/jem.20080091 (2008).
- 851 5 Decout, A., Katz, J. D., Venkatraman, S. & Ablasser, A. The cGAS-STING  
852 pathway as a therapeutic target in inflammatory diseases. *Nat Rev Immunol* **21**,  
853 548-569, doi:10.1038/s41577-021-00524-z (2021).
- 854 6 Mesev, E. V., LeDesma, R. A. & Ploss, A. Decoding type I and III interferon  
855 signalling during viral infection. *Nature Microbiology* **4**, 914-924,  
856 doi:10.1038/s41564-019-0421-x (2019).
- 857 7 Lazear, H. M., Schoggins, J. W. & Diamond, M. S. Shared and Distinct  
858 Functions of Type I and Type III Interferons. *Immunity* **50**, 907-923,  
859 doi:10.1016/j.immuni.2019.03.025 (2019).
- 860 8 Kotenko, S. V., Rivera, A., Parker, D. & Durbin, J. E. Type III IFNs: Beyond  
861 antiviral protection. *Semin Immunol* **43**, 101303,  
862 doi:10.1016/j.smim.2019.101303 (2019).
- 863 9 Schoggins, J. W. & Rice, C. M. Interferon-stimulated genes and their antiviral  
864 effector functions. *Curr Opin Virol* **1**, 519-525, doi:10.1016/j.coviro.2011.10.008  
865 (2011).

- 866 10 Park, A. & Iwasaki, A. Type I and Type III Interferons - Induction, Signaling,  
867 Evasion, and Application to Combat COVID-19. *Cell Host Microbe* **27**, 870-878,  
868 doi:10.1016/j.chom.2020.05.008 (2020).
- 869 11 Ye, L., Schnepf, D. & Staeheli, P. Interferon-lambda orchestrates innate and  
870 adaptive mucosal immune responses. *Nat Rev Immunol* **19**, 614-625,  
871 doi:10.1038/s41577-019-0182-z (2019).
- 872 12 Mesev, E. V., LeDesma, R. A. & Ploss, A. Decoding type I and III interferon  
873 signalling during viral infection. *Nat Microbiol* **4**, 914-924, doi:10.1038/s41564-  
874 019-0421-x (2019).
- 875 13 Forero, A. *et al.* Differential Activation of the Transcription Factor IRF1 Underlies  
876 the Distinct Immune Responses Elicited by Type I and Type III Interferons.  
877 *Immunity* **51**, 451-464 e456, doi:10.1016/j.immuni.2019.07.007 (2019).
- 878 14 Galani, I. E. *et al.* Interferon-lambda Mediates Non-redundant Front-Line  
879 Antiviral Protection against Influenza Virus Infection without Compromising Host  
880 Fitness. *Immunity* **46**, 875-890 e876, doi:10.1016/j.immuni.2017.04.025 (2017).
- 881 15 Fung, T. S. & Liu, D. X. Human Coronavirus: Host-Pathogen Interaction. *Annu*  
882 *Rev Microbiol* **73**, 529-557, doi:10.1146/annurev-micro-020518-115759 (2019).
- 883 16 Neufeldt, C. J. *et al.* SARS-CoV-2 infection induces a pro-inflammatory cytokine  
884 response through cGAS-STING and NF- $\kappa$ B. *bioRxiv*, 2020.2007.2021.212639,  
885 doi:10.1101/2020.07.21.212639 (2020).
- 886 17 Tay, M. Z., Poh, C. M., Rénia, L., MacAry, P. A. & Ng, L. F. P. The trinity of  
887 COVID-19: immunity, inflammation and intervention. *Nature Reviews*  
888 *Immunology* **20**, 363-374, doi:10.1038/s41577-020-0311-8 (2020).
- 889 18 Ivashkiv, L. B. & Donlin, L. T. Regulation of type I interferon responses. *Nat Rev*  
890 *Immunol* **14**, 36-49, doi:10.1038/nri3581 (2014).

- 891 19 Stanifer, M. L. *et al.* Critical Role of Type III Interferon in Controlling SARS-CoV-  
892 2 Infection in Human Intestinal Epithelial Cells. *Cell reports* **32**, 107863,  
893 doi:10.1016/j.celrep.2020.107863 (2020).
- 894 20 Triana, S. *et al.* Single-cell analyses reveal SARS-CoV-2 interference with  
895 intrinsic immune response in the human gut. *Molecular Systems Biology* **17**,  
896 e10232, doi:<https://doi.org/10.15252/msb.202110232> (2021).
- 897 21 Erlandsson, L. *et al.* Interferon-beta is required for interferon-alpha production  
898 in mouse fibroblasts. *Curr Biol* **8**, 223-226, doi:10.1016/s0960-9822(98)70086-  
899 7 (1998).
- 900 22 Phipps-Yonas, H., Seto, J., Sealfon, S. C., Moran, T. M. & Fernandez-Sesma,  
901 A. Interferon-beta pretreatment of conventional and plasmacytoid human  
902 dendritic cells enhances their activation by influenza virus. *PLoS Pathog* **4**,  
903 e1000193, doi:10.1371/journal.ppat.1000193 (2008).
- 904 23 Stewart, W. E., 2nd, Gosser, L. B. & Lockart, R. Z., Jr. Priming: a nonantiviral  
905 function of interferon. *J Virol* **7**, 792-801, doi:10.1128/JVI.7.6.792-801.1971  
906 (1971).
- 907 24 Kuri, T. *et al.* Interferon priming enables cells to partially overturn the SARS  
908 coronavirus-induced block in innate immune activation. *J Gen Virol* **90**, 2686-  
909 2694, doi:10.1099/vir.0.013599-0 (2009).
- 910 25 Felgenhauer, U. *et al.* Inhibition of SARS-CoV-2 by type I and type III  
911 interferons. *J Biol Chem* **295**, 13958-13964, doi:10.1074/jbc.AC120.013788  
912 (2020).
- 913 26 Stanifer, M. L., Guo, C., Doldan, P. & Boulant, S. Importance of Type I and III  
914 Interferons at Respiratory and Intestinal Barrier Surfaces. *Frontiers in*  
915 *immunology* **11**, 608645, doi:10.3389/fimmu.2020.608645 (2020).



- 916 27 Vanderheiden, A. *et al.* Type I and Type III Interferons Restrict SARS-CoV-2  
917 Infection of Human Airway Epithelial Cultures. *J Virol* **94**,  
918 doi:10.1128/JVI.00985-20 (2020).
- 919 28 Busnadiego, I. *et al.* Antiviral Activity of Type I, II, and III Interferons  
920 Counterbalances ACE2 Inducibility and Restricts SARS-CoV-2. *mBio* **11**,  
921 doi:10.1128/mBio.01928-20 (2020).
- 922 29 Lamers, M. M. *et al.* An organoid-derived bronchioalveolar model for SARS-  
923 CoV-2 infection of human alveolar type II-like cells. *EMBO J* **40**, e105912,  
924 doi:10.15252/emj.2020105912 (2021).
- 925 30 Zhu, Q. *et al.* Inhibition of coronavirus infection by a synthetic STING agonist in  
926 primary human airway system. *Antiviral Research* **187**, 105015,  
927 doi:<https://doi.org/10.1016/j.antiviral.2021.105015> (2021).
- 928 31 Liu, W. *et al.* Activation of STING Signaling Pathway Effectively Blocks Human  
929 Coronavirus Infection. *J Virol* **95**, doi:10.1128/jvi.00490-21 (2021).
- 930 32 Li, M. *et al.* Pharmacological activation of STING blocks SARS-CoV-2 infection.  
931 *Science Immunology* **6**, eabi9007, doi:10.1126/sciimmunol.abi9007 (2021).
- 932 33 Humphries, F. *et al.* A diamidobenzimidazole STING agonist protects against  
933 SARS-CoV-2 infection. *Science Immunology* **6**, eabi9002,  
934 doi:10.1126/sciimmunol.abi9002 (2021).
- 935 34 Broggi, A. *et al.* Type III interferons disrupt the lung epithelial barrier upon viral  
936 recognition. *Science* **369**, 706-712, doi:10.1126/science.abc3545 (2020).
- 937 35 Major, J. *et al.* Type I and III interferons disrupt lung epithelial repair during  
938 recovery from viral infection. *Science* **369**, 712-717,  
939 doi:10.1126/science.abc2061 (2020).

- 940 36 Isaacson, M. K. & Ploegh, H. L. Ubiquitination, ubiquitin-like modifiers, and  
941 deubiquitination in viral infection. *Cell Host Microbe* **5**, 559-570,  
942 doi:10.1016/j.chom.2009.05.012 (2009).
- 943 37 van Huizen, M. & Kikkert, M. The Role of Atypical Ubiquitin Chains in the  
944 Regulation of the Antiviral Innate Immune Response. *Front Cell Dev Biol* **7**, 392,  
945 doi:10.3389/fcell.2019.00392 (2019).
- 946 38 Heaton, S. M., Borg, N. A. & Dixit, V. M. Ubiquitin in the activation and  
947 attenuation of innate antiviral immunity. *The Journal of experimental medicine*  
948 **213**, 1-13, doi:10.1084/jem.20151531 (2016).
- 949 39 Tsuchida, T. *et al.* The ubiquitin ligase TRIM56 regulates innate immune  
950 responses to intracellular double-stranded DNA. *Immunity* **33**, 765-776,  
951 doi:10.1016/j.immuni.2010.10.013 (2010).
- 952 40 Zhang, J., Hu, M. M., Wang, Y. Y. & Shu, H. B. TRIM32 protein modulates type  
953 I interferon induction and cellular antiviral response by targeting MITA/STING  
954 protein for K63-linked ubiquitination. *J Biol Chem* **287**, 28646-28655,  
955 doi:10.1074/jbc.M112.362608 (2012).
- 956 41 Ni, G., Konno, H. & Barber, G. N. Ubiquitination of STING at lysine 224 controls  
957 IRF3 activation. *Sci Immunol* **2**, doi:10.1126/sciimmunol.aah7119 (2017).
- 958 42 Wang, Q. *et al.* The E3 ubiquitin ligase AMFR and INSIG1 bridge the activation  
959 of TBK1 kinase by modifying the adaptor STING. *Immunity* **41**, 919-933,  
960 doi:10.1016/j.immuni.2014.11.011 (2014).
- 961 43 Zhong, B. *et al.* The ubiquitin ligase RNF5 regulates antiviral responses by  
962 mediating degradation of the adaptor protein MITA. *Immunity* **30**, 397-407,  
963 doi:10.1016/j.immuni.2009.01.008 (2009).

- 964 44 Xing, J. *et al.* TRIM29 promotes DNA virus infections by inhibiting innate  
965 immune response. *Nature Communications* **8**, 945, doi:10.1038/s41467-017-  
966 00101-w (2017).
- 967 45 Fenech, E. J. *et al.* Interaction mapping of endoplasmic reticulum ubiquitin  
968 ligases identifies modulators of innate immune signalling. *eLife* **9**,  
969 doi:10.7554/eLife.57306 (2020).
- 970 46 Sun, H. *et al.* USP13 negatively regulates antiviral responses by  
971 deubiquitinating STING. *Nature Communications* **8**, 15534,  
972 doi:10.1038/ncomms15534 (2017).
- 973 47 Zhang, J. *et al.* Deubiquitinase USP35 restrains STING-mediated interferon  
974 signaling in ovarian cancer. *Cell Death & Differentiation* **28**, 139-155,  
975 doi:10.1038/s41418-020-0588-y (2021).
- 976 48 Zhang, L. *et al.* The deubiquitinase CYLD is a specific checkpoint of the STING  
977 antiviral signaling pathway. *PLOS Pathogens* **14**, e1007435,  
978 doi:10.1371/journal.ppat.1007435 (2018).
- 979 49 Zhang, X. Y. *et al.* The putative cancer stem cell marker USP22 is a subunit of  
980 the human SAGA complex required for activated transcription and cell-cycle  
981 progression. *Mol Cell* **29**, 102-111, doi:10.1016/j.molcel.2007.12.015 (2008).
- 982 50 Zhao, Y. *et al.* A TFTC/STAGA module mediates histone H2A and H2B  
983 deubiquitination, coactivates nuclear receptors, and counteracts  
984 heterochromatin silencing. *Molecular cell* **29**, 92-101,  
985 doi:10.1016/j.molcel.2007.12.011 (2008).
- 986 51 Zhang, X. Y., Pfeiffer, H. K., Thorne, A. W. & McMahon, S. B. USP22, an  
987 hSAGA subunit and potential cancer stem cell marker, reverses the polycomb-  
988 catalyzed ubiquitylation of histone H2A. *Cell Cycle* **7**, 1522-1524,  
989 doi:10.4161/cc.7.11.5962 (2008).

- 990 52 Kosinsky, R. L. *et al.* USP22-dependent HSP90AB1 expression promotes  
991 resistance to HSP90 inhibition in mammary and colorectal cancer. *Cell Death*  
992 *Dis* **10**, 911, doi:10.1038/s41419-019-2141-9 (2019).
- 993 53 Kosinsky, R. L. *et al.* USP22 exerts tumor-suppressive functions in colorectal  
994 cancer by decreasing mTOR activity. *Cell Death Differ*, doi:10.1038/s41418-  
995 019-0420-8 (2019).
- 996 54 Roedig, J. *et al.* USP22 controls necroptosis by regulating receptor-interacting  
997 protein kinase 3 ubiquitination. *EMBO Rep* **22**, e50163,  
998 doi:10.15252/embr.202050163 (2021).
- 999 55 Cai, Z. *et al.* USP22 promotes IRF3 nuclear translocation and antiviral  
1000 responses by deubiquitinating the importin protein KPNA2. *The Journal of*  
1001 *experimental medicine* **217**, doi:10.1084/jem.20191174 (2020).
- 1002 56 Liu, Q. *et al.* Broad and diverse mechanisms used by deubiquitinase family  
1003 members in regulating the type I interferon signaling pathway during antiviral  
1004 responses. *Sci Adv* **4**, eaar2824, doi:10.1126/sciadv.aar2824 (2018).
- 1005 57 Atanassov, B. S. *et al.* ATXN7L3 and ENY2 Coordinate Activity of Multiple H2B  
1006 Deubiquitinases Important for Cellular Proliferation and Tumor Growth. *Mol Cell*  
1007 **62**, 558-571, doi:10.1016/j.molcel.2016.03.030 (2016).
- 1008 58 Lanning, N. J. *et al.* A mitochondrial RNAi screen defines cellular bioenergetic  
1009 determinants and identifies an adenylate kinase as a key regulator of ATP  
1010 levels. *Cell Rep* **7**, 907-917, doi:10.1016/j.celrep.2014.03.065 (2014).
- 1011 59 Sasaki, N. *et al.* Reg4<sup>+</sup> deep crypt secretory cells function as epithelial niche  
1012 for Lgr5<sup>+</sup> stem cells in colon. *Proc Natl Acad Sci U S A* **113**, E5399-5407,  
1013 doi:10.1073/pnas.1607327113 (2016).

- 1014 60 Dietlein, N. *et al.* Loss of Usp22 enhances histone H2B monoubiquitination and  
1015 stimulates intracellular and systemic interferon immunity. *bioRxiv*,  
1016 2021.2004.2009.439190, doi:10.1101/2021.04.09.439190 (2021).
- 1017 61 Hong, A., Lee, J. E. & Chung, K. C. Ubiquitin-Specific Protease 22 (USP22)  
1018 Positively Regulates RCAN1 Protein Levels Through RCAN1 De-Ubiquitination.  
1019 *J Cell Physiol* **230**, 1651-1660, doi:10.1002/jcp.24917 (2015).
- 1020 62 Basters, A., Knobloch, K. P. & Fritz, G. USP18 - a multifunctional component  
1021 in the interferon response. *Biosci Rep* **38**, doi:10.1042/BSR20180250 (2018).
- 1022 63 Gough, D. J., Messina, N. L., Clarke, C. J. P., Johnstone, R. W. & Levy, D. E.  
1023 Constitutive type I interferon modulates homeostatic balance through tonic  
1024 signaling. *Immunity* **36**, 166-174, doi:10.1016/j.immuni.2012.01.011 (2012).
- 1025 64 Cheon, H. & Stark, G. R. Unphosphorylated STAT1 prolongs the expression of  
1026 interferon-induced immune regulatory genes. *Proc Natl Acad Sci U S A* **106**,  
1027 9373-9378, doi:10.1073/pnas.0903487106 (2009).
- 1028 65 Kotenko, S. V. *et al.* IFN-lambdas mediate antiviral protection through a distinct  
1029 class II cytokine receptor complex. *Nat Immunol* **4**, 69-77, doi:10.1038/ni875  
1030 (2003).
- 1031 66 Sheppard, P. *et al.* IL-28, IL-29 and their class II cytokine receptor IL-28R. *Nat*  
1032 *Immunol* **4**, 63-68, doi:10.1038/ni873 (2003).
- 1033 67 Brzostek-Racine, S., Gordon, C., Van Scoy, S. & Reich, N. C. The DNA damage  
1034 response induces IFN. *Journal of immunology* **187**, 5336-5345,  
1035 doi:10.4049/jimmunol.1100040 (2011).
- 1036 68 Ramachandran, S. *et al.* The SAGA Deubiquitination Module Promotes DNA  
1037 Repair and Class Switch Recombination through ATM and DNAPK-Mediated  
1038 gammaH2AX Formation. *Cell Rep* **15**, 1554-1565,  
1039 doi:10.1016/j.celrep.2016.04.041 (2016).

- 1040 69 Li, C. *et al.* The H2B deubiquitinase Usp22 promotes antibody class switch  
1041 recombination by facilitating non-homologous end joining. *Nat Commun* **9**,  
1042 1006, doi:10.1038/s41467-018-03455-x (2018).
- 1043 70 Stetson, D. B. & Medzhitov, R. Recognition of cytosolic DNA activates an IRF3-  
1044 dependent innate immune response. *Immunity* **24**, 93-103,  
1045 doi:10.1016/j.immuni.2005.12.003 (2006).
- 1046 71 Ishikawa, H., Ma, Z. & Barber, G. N. STING regulates intracellular DNA-  
1047 mediated, type I interferon-dependent innate immunity. *Nature* **461**, 788-792,  
1048 doi:10.1038/nature08476 (2009).
- 1049 72 Wang, Z., Zhu, L., Guo, T., Wang, Y. & Yang, J. Decreased H2B  
1050 monoubiquitination and overexpression of ubiquitin-specific protease enzyme  
1051 22 in malignant colon carcinoma. *Hum Pathol* **46**, 1006-1014,  
1052 doi:10.1016/j.humpath.2015.04.001 (2015).
- 1053 73 Lee, J. S. *et al.* Histone crosstalk between H2B monoubiquitination and H3  
1054 methylation mediated by COMPASS. *Cell* **131**, 1084-1096,  
1055 doi:10.1016/j.cell.2007.09.046 (2007).
- 1056 74 Xiao, T. *et al.* Histone H2B ubiquitylation is associated with elongating RNA  
1057 polymerase II. *Mol Cell Biol* **25**, 637-651, doi:10.1128/MCB.25.2.637-651.2005  
1058 (2005).
- 1059 75 Minsky, N. *et al.* Monoubiquitinated H2B is associated with the transcribed  
1060 region of highly expressed genes in human cells. *Nat Cell Biol* **10**, 483-488,  
1061 doi:10.1038/ncb1712 (2008).
- 1062 76 Martin-Sancho, L. *et al.* Functional landscape of SARS-CoV-2 cellular  
1063 restriction. *Mol Cell* **81**, 2656-2668 e2658, doi:10.1016/j.molcel.2021.04.008  
1064 (2021).

- 1065 77 Fonseca, G. J. *et al.* Adenovirus evasion of interferon-mediated innate immunity  
1066 by direct antagonism of a cellular histone posttranslational modification. *Cell*  
1067 *Host Microbe* **11**, 597-606, doi:10.1016/j.chom.2012.05.005 (2012).
- 1068 78 Zhu, B. *et al.* Monoubiquitination of human histone H2B: the factors involved  
1069 and their roles in HOX gene regulation. *Mol Cell* **20**, 601-611,  
1070 doi:10.1016/j.molcel.2005.09.025 (2005).
- 1071 79 Zhang, S., Wang, J. & Cheng, G. Protease cleavage of RNF20 facilitates  
1072 coronavirus replication via stabilization of SREBP1. *Proc Natl Acad Sci U S A*  
1073 **118**, doi:10.1073/pnas.2107108118 (2021).
- 1074 80 Sui, H. *et al.* STING is an essential mediator of the Ku70-mediated production  
1075 of IFN- $\lambda$ 1 in response to exogenous DNA. *Science signaling* **10**,  
1076 doi:10.1126/scisignal.aah5054 (2017).
- 1077 81 Chen, J. *et al.* STING-Dependent Interferon- $\lambda$ 1 Induction in HT29 Cells, a  
1078 Human Colorectal Cancer Cell Line, After Gamma-Radiation. *International*  
1079 *journal of radiation oncology, biology, physics* **101**, 97-106,  
1080 doi:10.1016/j.ijrobp.2018.01.091 (2018).
- 1081 82 Di Domizio, J. *et al.* The cGAS-STING pathway drives type I IFN  
1082 immunopathology in COVID-19. *Nature*, doi:10.1038/s41586-022-04421-w  
1083 (2022).
- 1084 83 Livak, K. J. & Schmittgen, T. D. Analysis of relative gene expression data using  
1085 real-time quantitative PCR and the 2<sup>(-Delta Delta C(T))</sup> Method. *Methods* **25**,  
1086 402-408, doi:10.1006/meth.2001.1262 (2001).
- 1087 84 Carvalho, B. S. & Irizarry, R. A. A framework for oligonucleotide microarray  
1088 preprocessing. *Bioinformatics (Oxford, England)* **26**, 2363-2367,  
1089 doi:10.1093/bioinformatics/btq431 (2010).

- 1090 85 Ritchie, M. E. *et al.* limma powers differential expression analyses for RNA-  
1091 sequencing and microarray studies. *Nucleic Acids Res* **43**, e47,  
1092 doi:10.1093/nar/gkv007 (2015).
- 1093 86 Luo, W., Friedman, M. S., Shedden, K., Hankenson, K. D. & Woolf, P. J. GAGE:  
1094 generally applicable gene set enrichment for pathway analysis. *BMC*  
1095 *Bioinformatics* **10**, 161, doi:10.1186/1471-2105-10-161 (2009).
- 1096 87 Subramanian, A. *et al.* Gene set enrichment analysis: A knowledge-based  
1097 approach for interpreting genome-wide expression profiles. *Proceedings of the*  
1098 *National Academy of Sciences* **102**, 15545-15550,  
1099 doi:10.1073/pnas.0506580102 (2005).
- 1100 88 Hjerpe, R. *et al.* Efficient protection and isolation of ubiquitylated proteins using  
1101 tandem ubiquitin-binding entities. *EMBO Rep* **10**, 1250-1258,  
1102 doi:10.1038/embor.2009.192 (2009).
- 1103



A

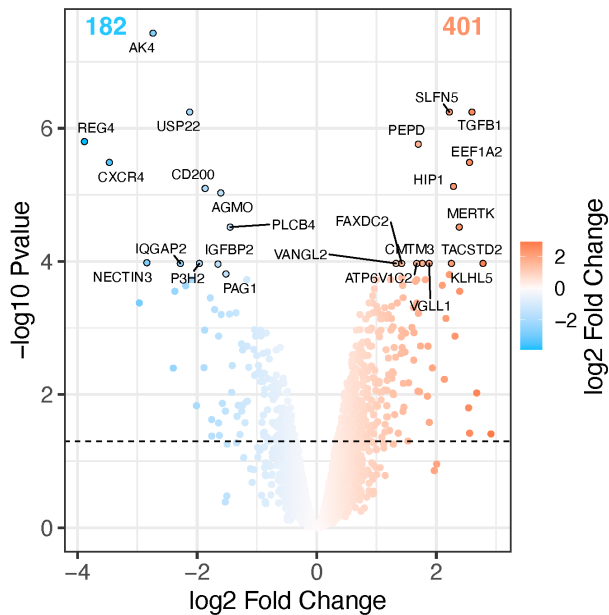

B

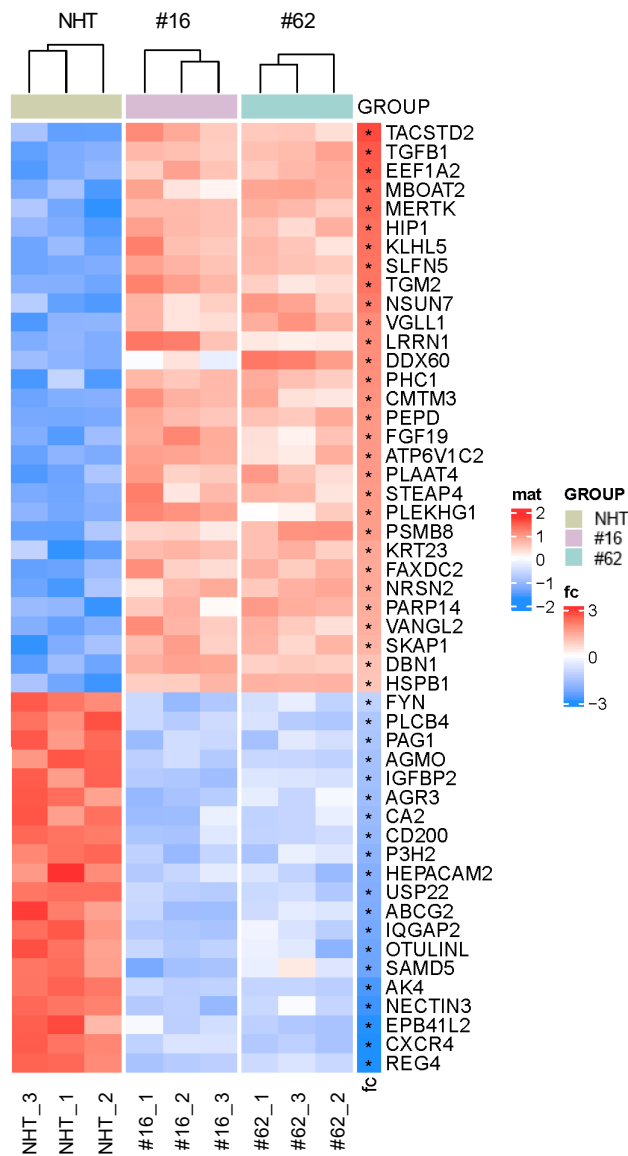

C

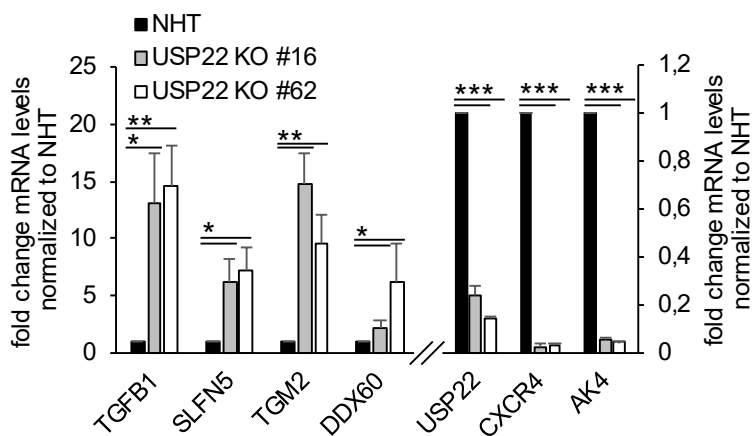

A

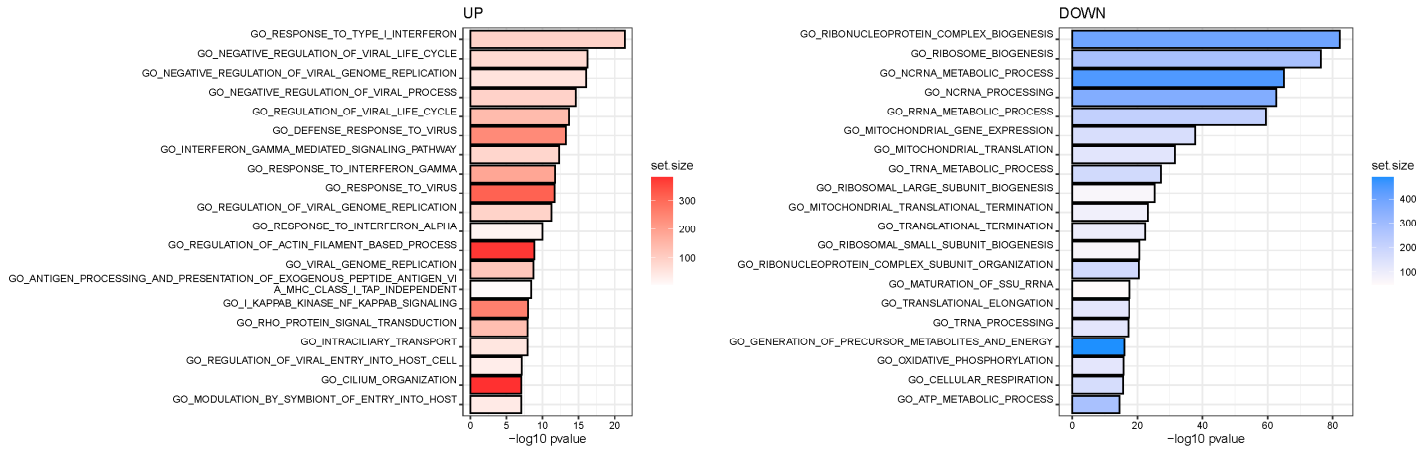

B

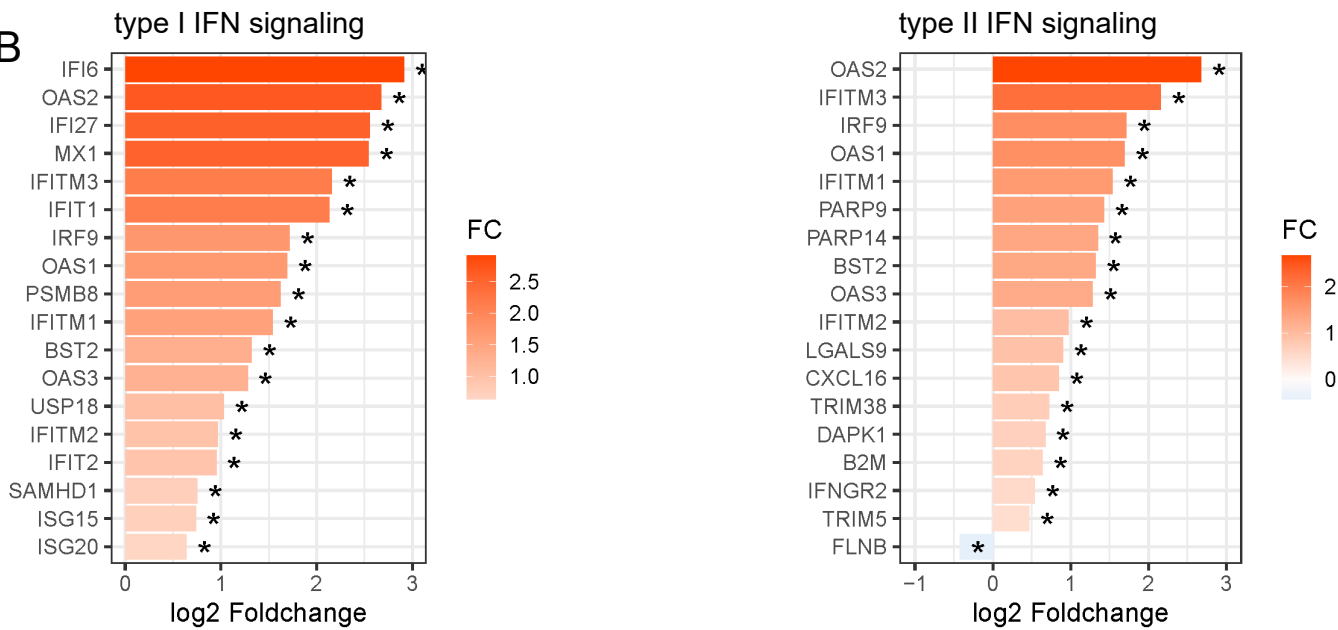

C

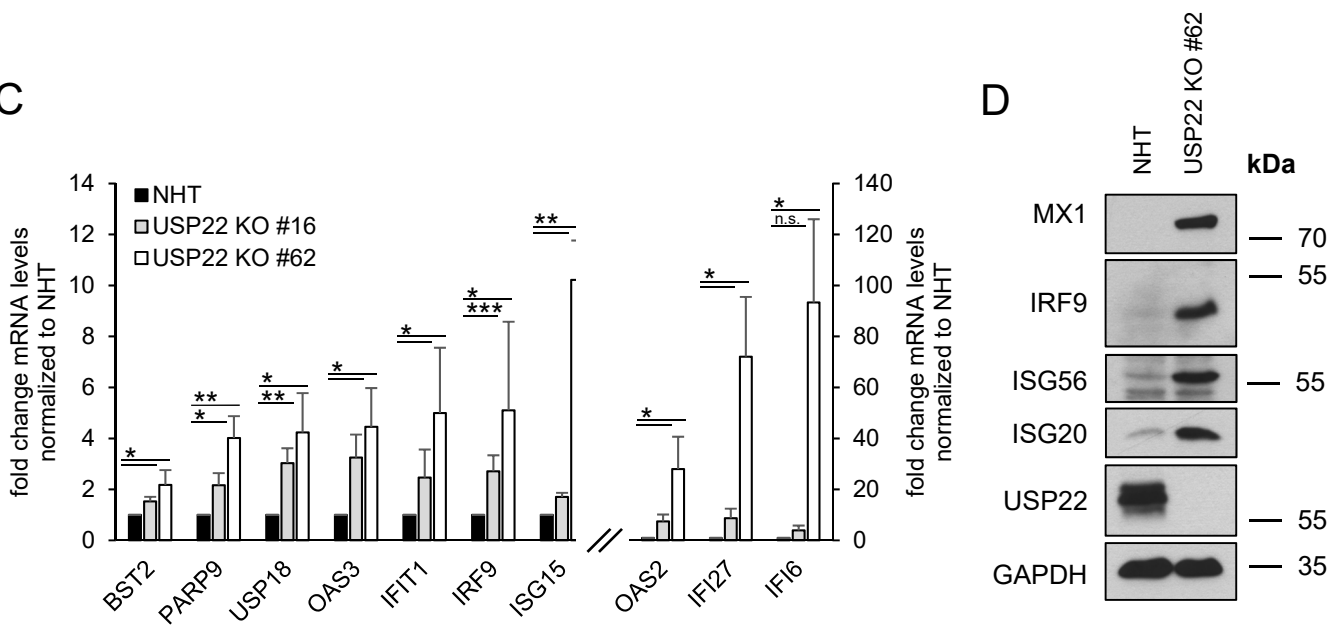

D

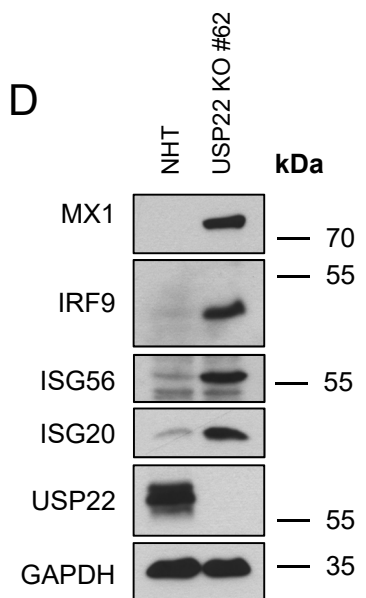

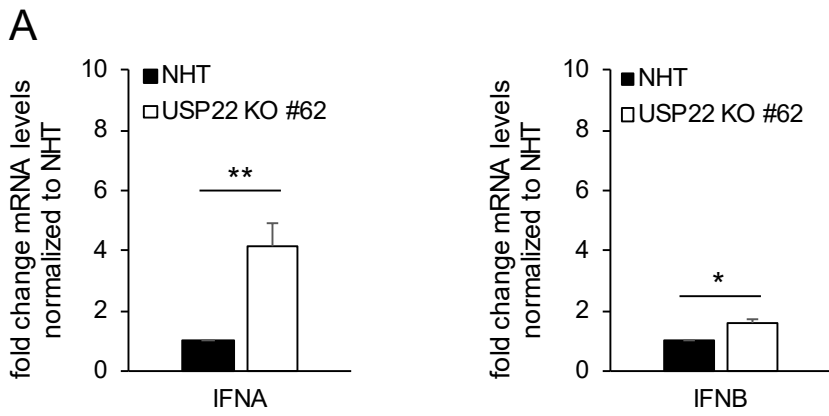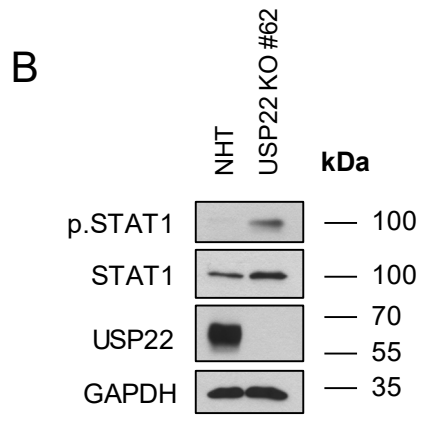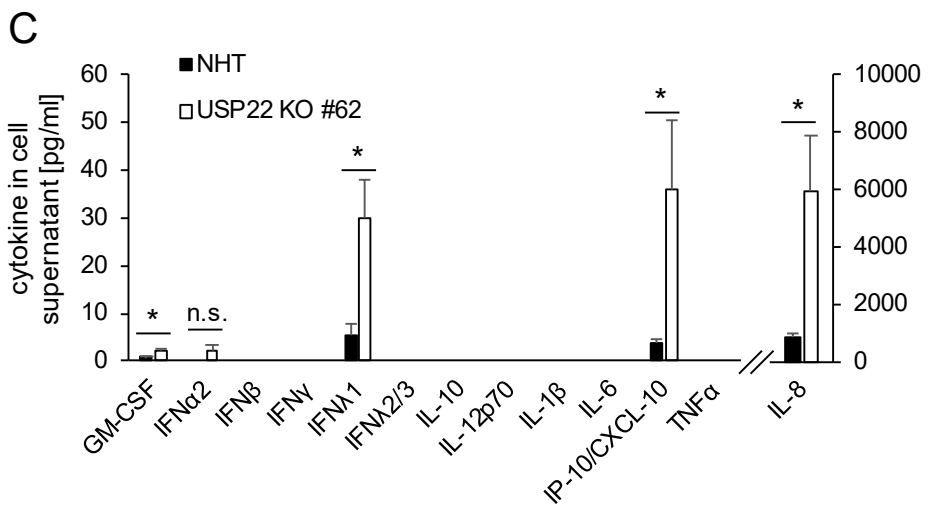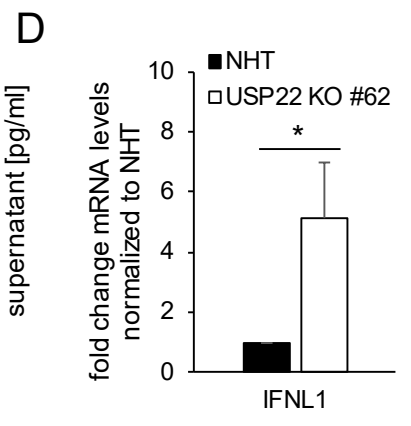

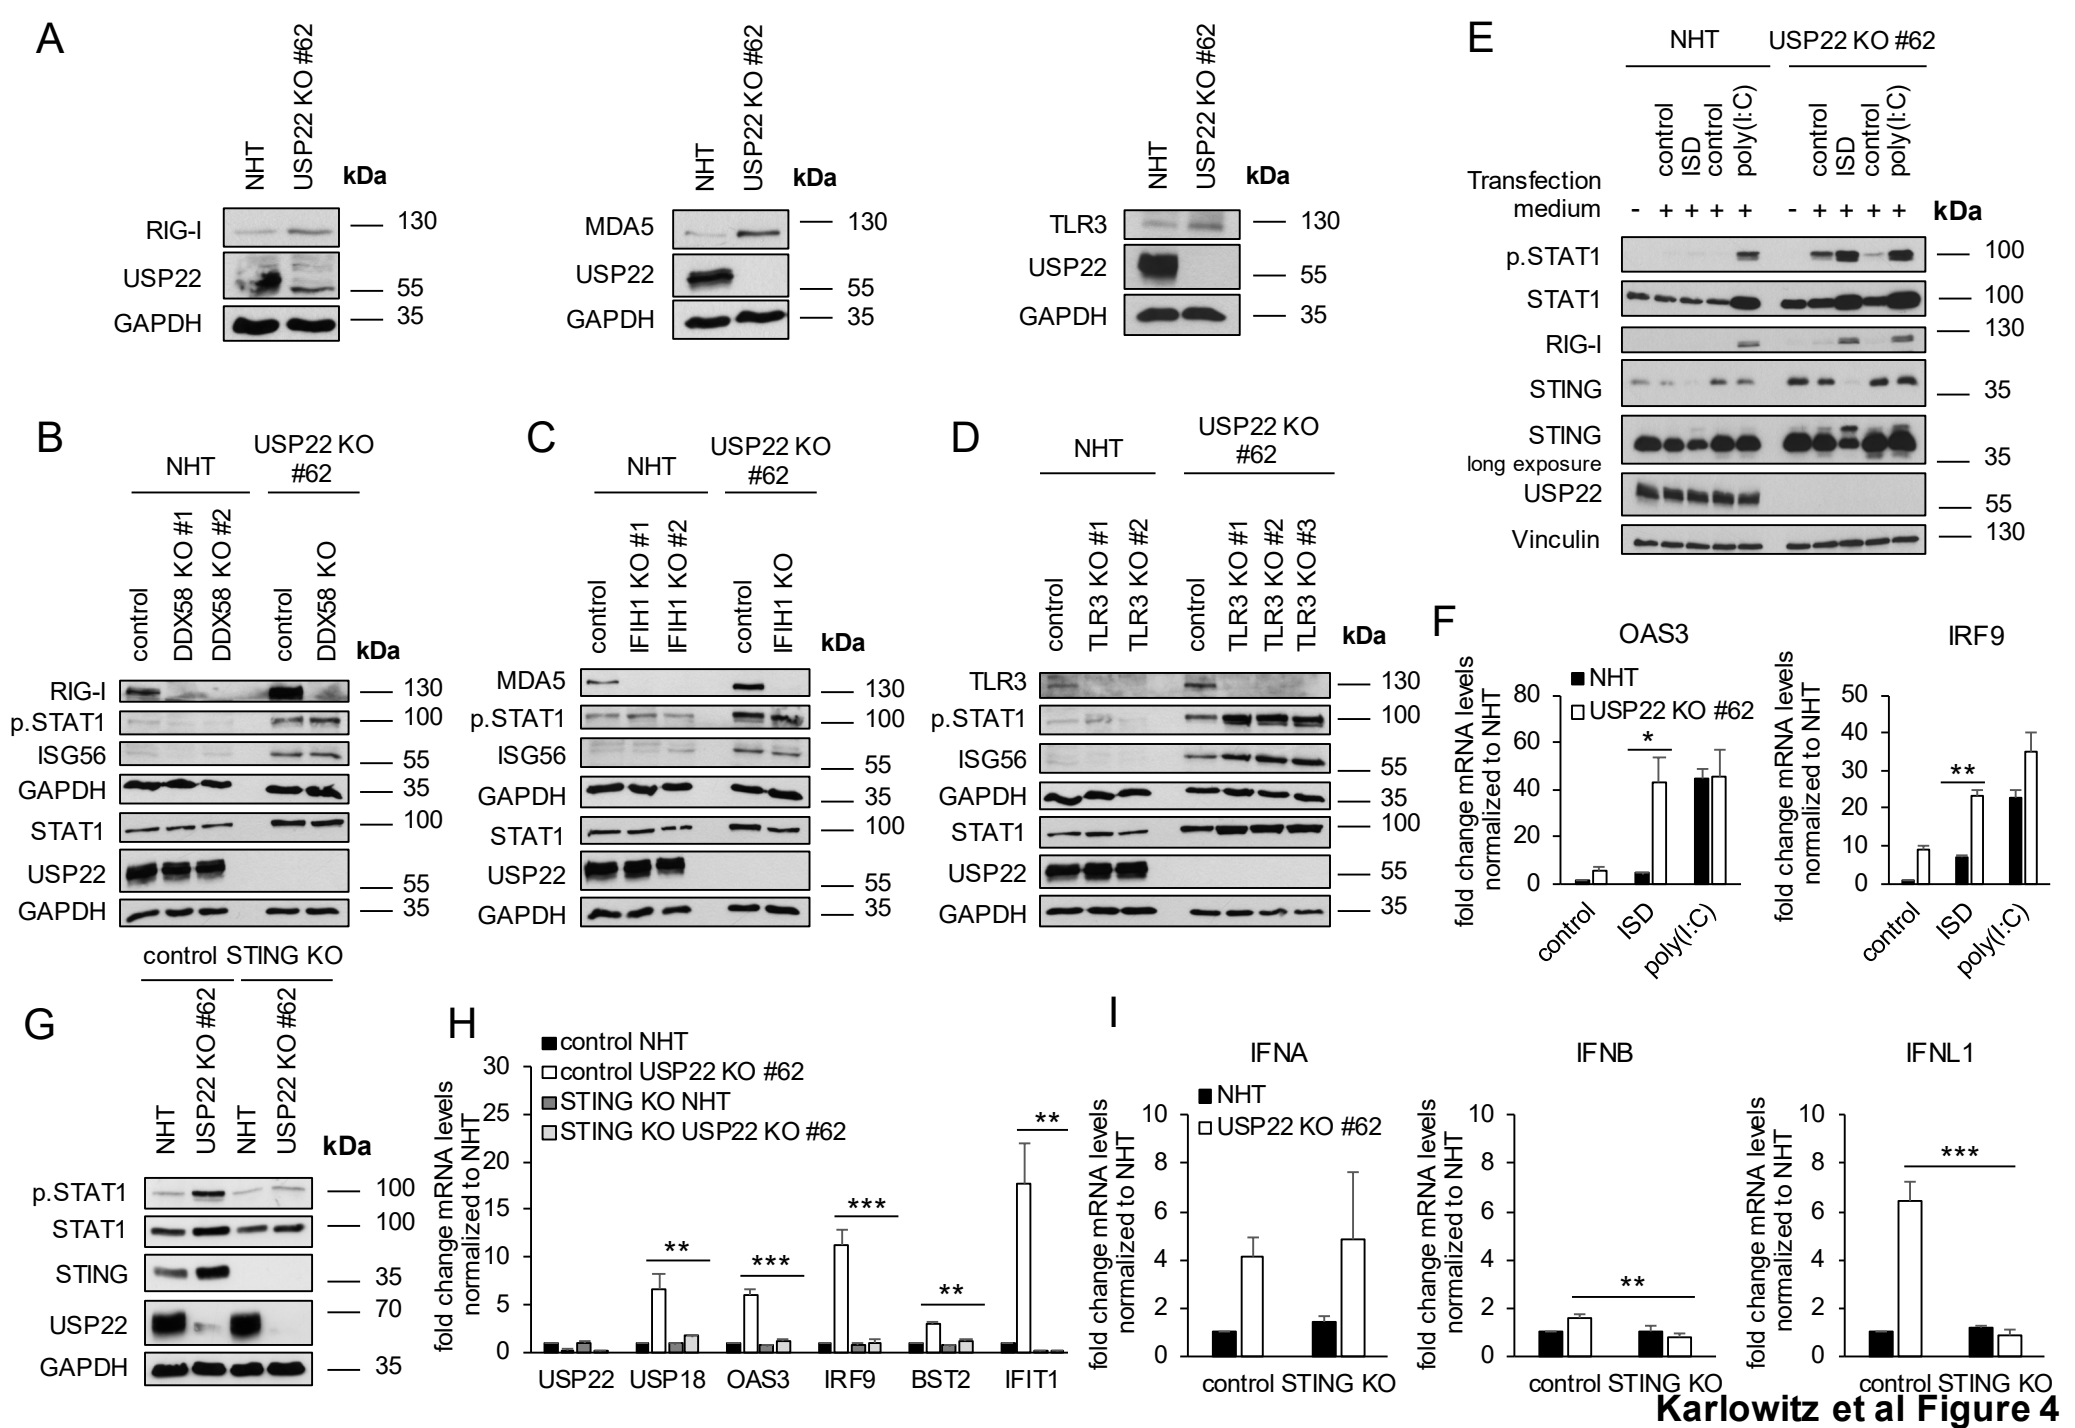

**A**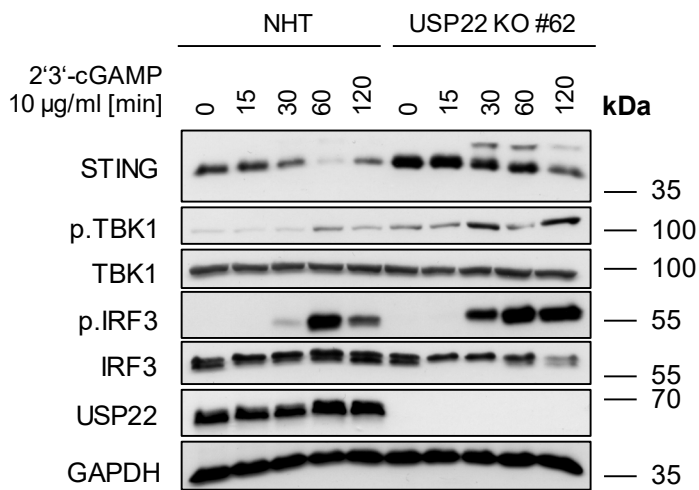**B**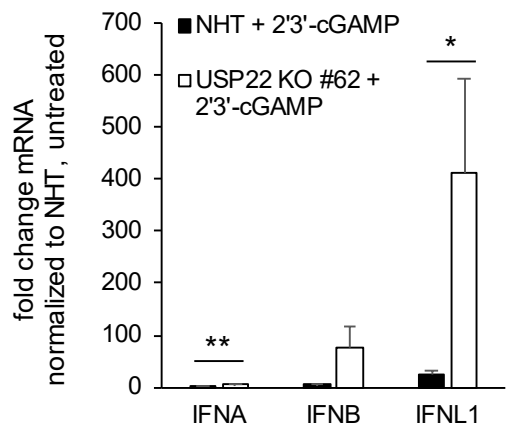**C**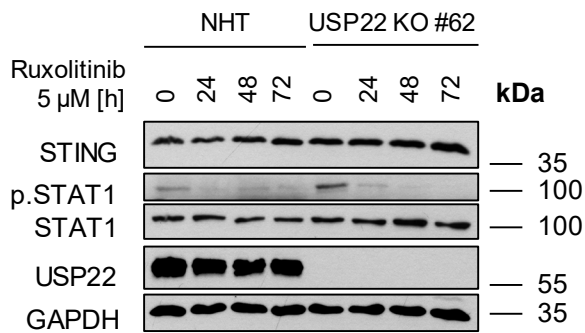**E**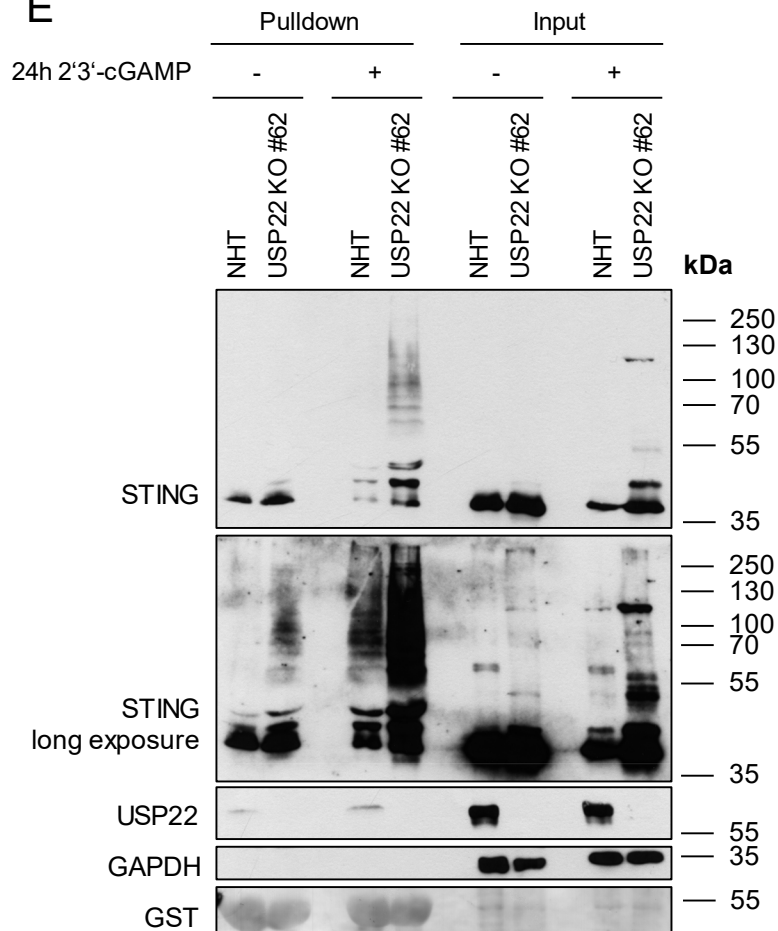**D**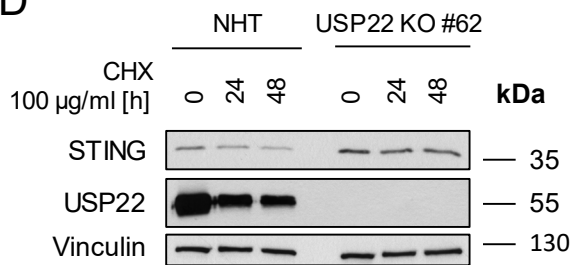

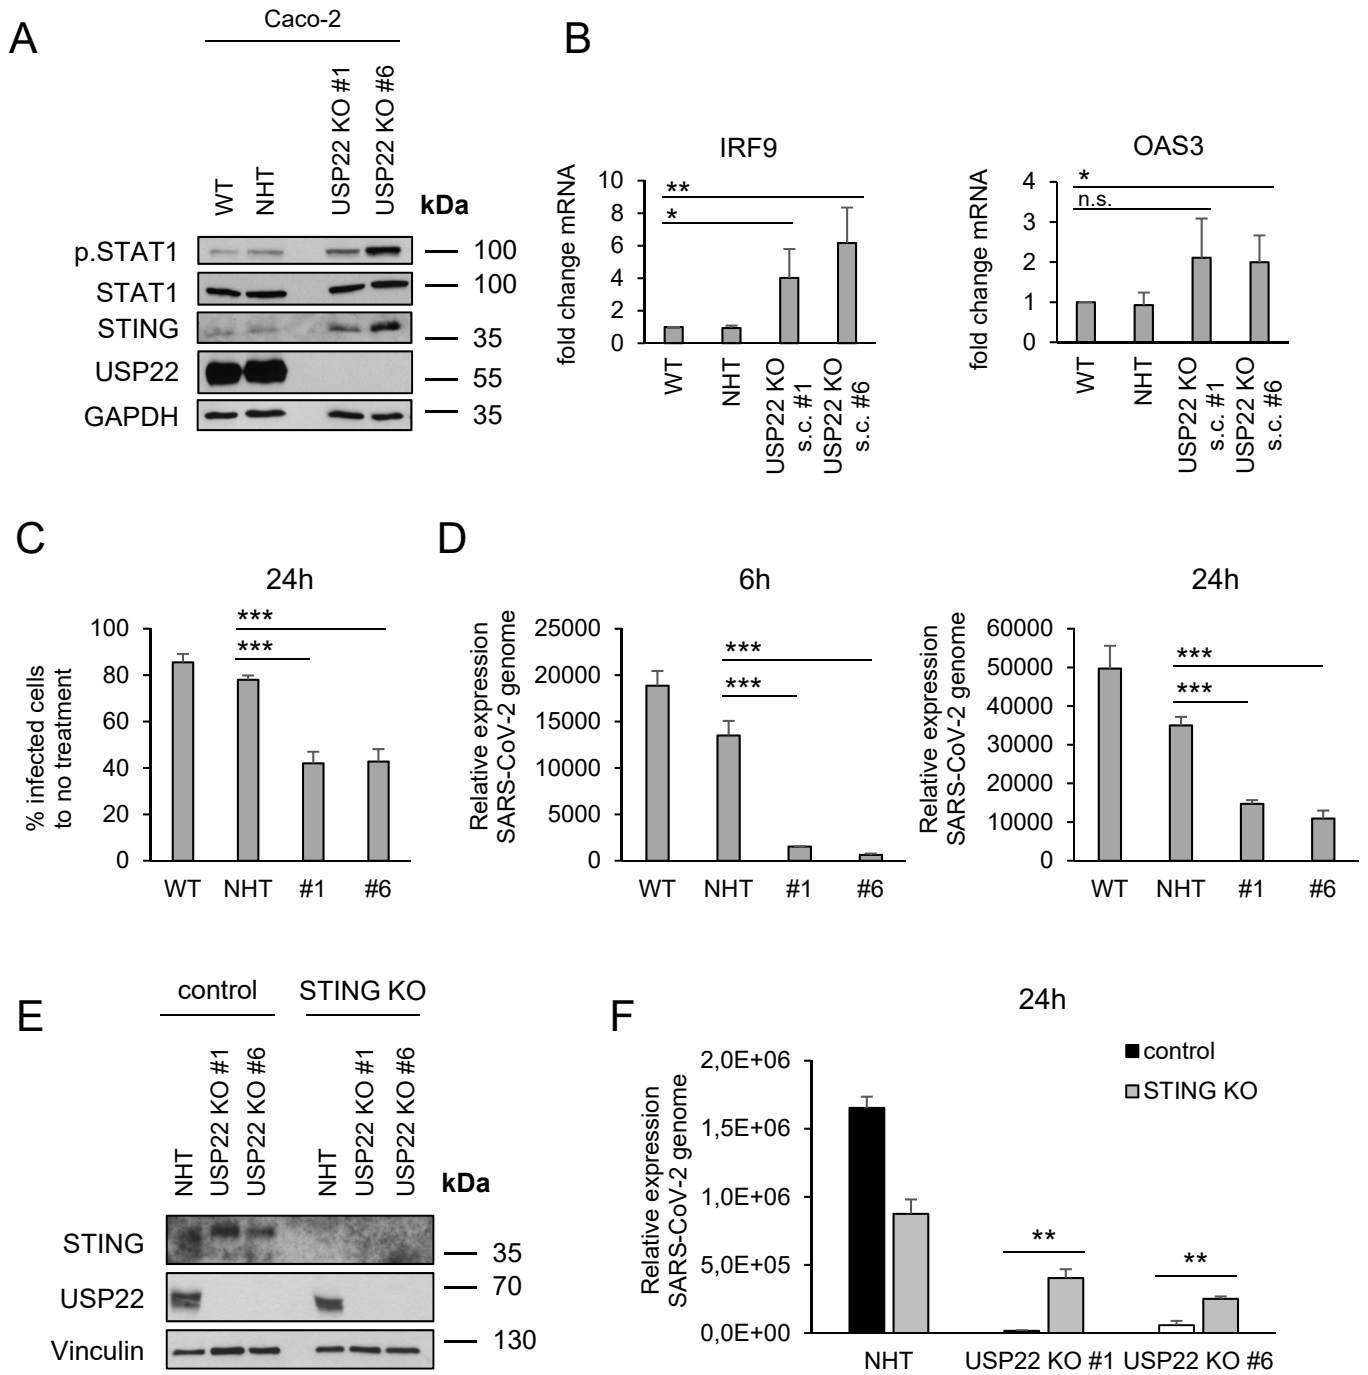

## Supplementary Information

### USP22 controls type III interferon signaling and SARS-CoV-2 infection through activation of STING

*Rebekka Karlowitz, Megan L. Stanifer, Jens Roedig, Geoffroy Andrieux, Denisa Bojkova, Sonja Smith, Lisa Kowald, Ralf Schubert, Melanie Boerries, Jindrich Cinatl Jr., Steeve Boulant, Sjoerd J. L. van Wijk<sup>#</sup>*

<sup>#</sup> Corresponding author: Sjoerd J. L. van Wijk, Institute for Experimental Cancer Research in Pediatrics, Goethe University Frankfurt, Komturstrasse 3a, 60528 Frankfurt am Main, Germany, Phone: +49 69 67866574, Fax: +49 69 6786659158, Email: [vanWijk@med.uni-frankfurt.de](mailto:vanWijk@med.uni-frankfurt.de), [s.wijk@kinderkrebsstiftung-frankfurt.de](mailto:s.wijk@kinderkrebsstiftung-frankfurt.de)

**Summary:** Four Supplementary Figures including Supplementary Figure legends and a Supplementary Table

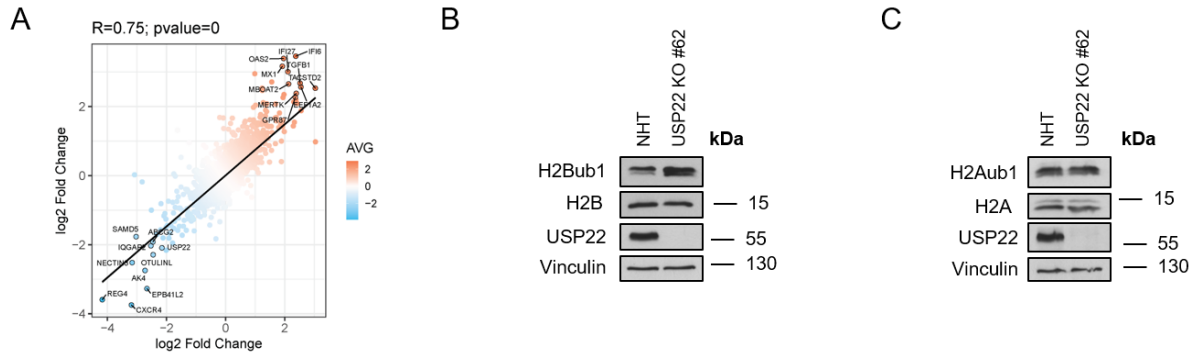

**Supplemental Figure 1 (related to Figure 1).** **A.** Scatter plot demonstrating the changes in gene expression of CRISPR/Cas9 control (NHT) HT-29 cells with two independent single-cell HT-29 USP22 KO clones (#16 and #62). Color code represents the average log<sub>2</sub> foldchange. **B, C.** Western blot analysis of mono-ubiquitinated (H2Bub1) and total levels of Histone 2B (H2B) (**B**) and Histone 2A (H2A) (**C**) as well as USP22 in control and USP22 KO HT-29 cells (USP22 KO #62). Vinculin served as loading control. Representative blots of at least two different independent experiments are shown.



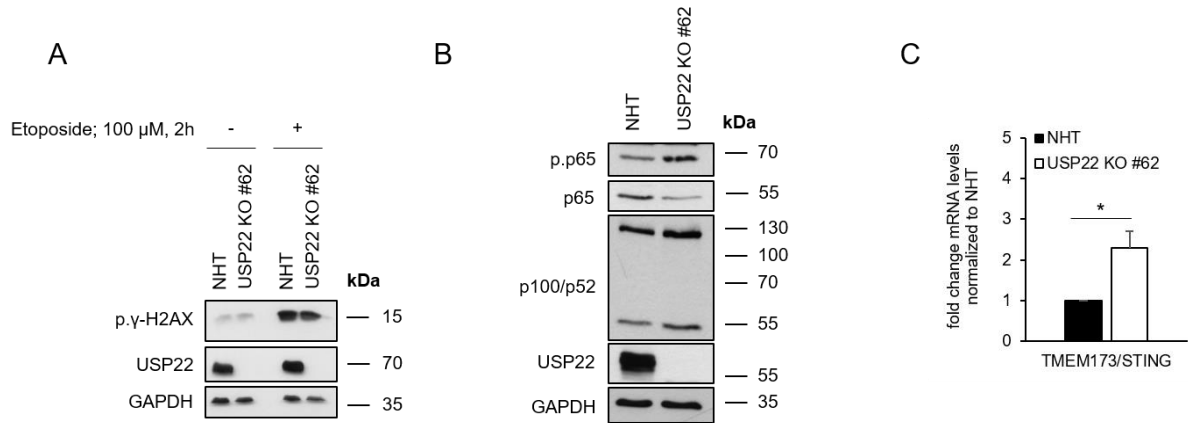

**Supplemental Figure 2 (related to Figure 3).** **A.** Western blot analysis of phosphorylated  $\gamma$ -H2AX (p. $\gamma$ -H2AX) and USP22 expression levels in control (non-human target: NHT) and CRISPR/Cas9-generated USP22 knock-out (KO) HT-29 cells (USP22 KO) subjected to vehicle or etoposide (100  $\mu$ M) for 2 h. GAPDH served as loading control. Representative blots of at least two different independent experiments are shown. **B.** Western blot analysis of phosphorylated and total p65, p100/p52 and USP22 expression levels in control and USP22 KO HT-29 cells (USP22 KO #62). GAPDH served as loading control. Representative blots of at least two different independent experiments are shown. **C.** Basal mRNA expression levels of TMEM173/STING in control and USP22 KO HT-29 cells (USP22 KO #62) using qRT-PCR. Gene expression was normalized against 28S mRNA and is presented as x-fold mRNA expression compared to NHT. Mean and SD of three independent experiments in triplicate are shown. \*P < 0.05.

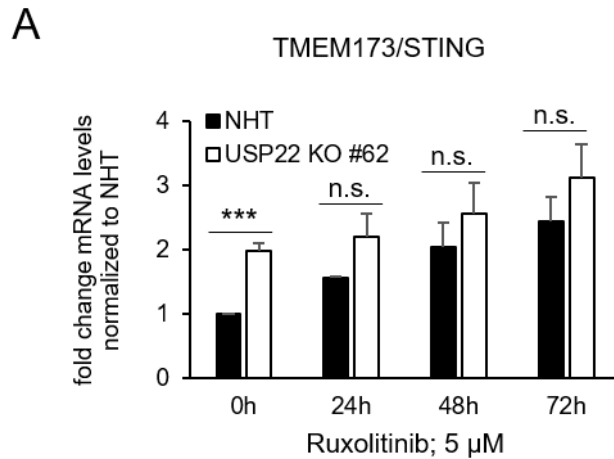

**Supplemental Figure 3 (related to Figure 5). A.** mRNA expression levels of TMEM173/STING in control (non-human target: NHT) and CRISPR/Cas9-generated USP22 knock-out (KO) HT-29 cells (USP22 KO) using qRT-PCR. Cells were treated with ruxolitinib (5  $\mu$ M) for the indicated timepoints. Gene expression was normalized against 28S mRNA and is presented as x-fold mRNA expression compared to NHT. Mean and SD of three independent experiments in triplicate are shown. \*\*\*P < 0.001, n.s. not significant.

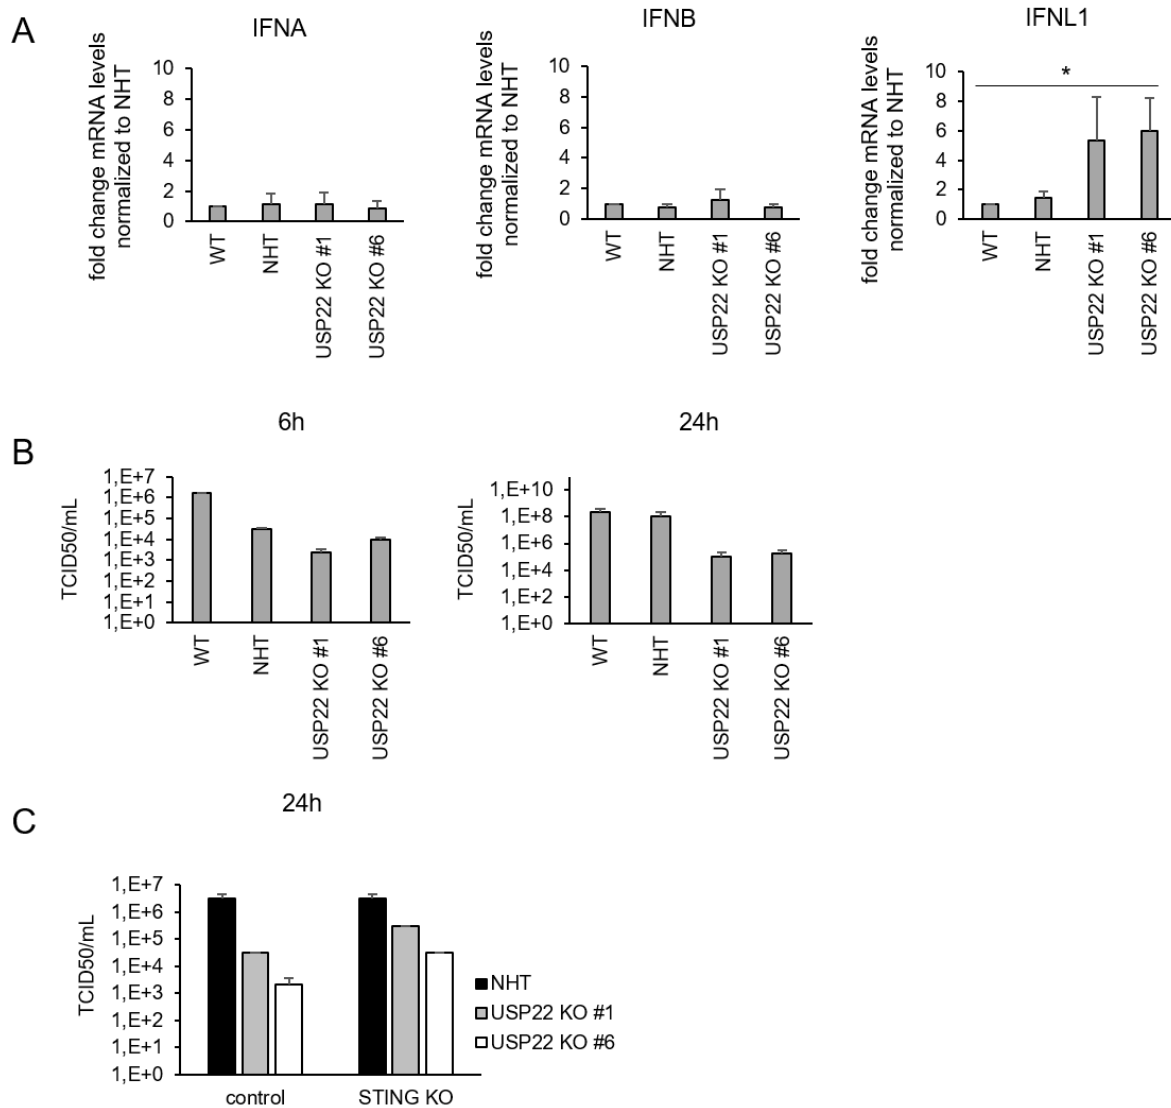

### Supplemental Figure 4 (related to Figure 6).

**A.** Basal mRNA expression levels of IFNA, IFNB and IFNL1 in wild-type (WT), control (non-human target: NHT) and CRISPR/Cas9-generated USP22 knock-out (KO) Caco-2 single clones (USP22 KO #1 and #6). Gene expression was normalized against 28S mRNA and is presented as x-fold mRNA expression compared to NHT. Mean and SD of four (IFNA, IFNB) or three (IFNL1) independent experiments in triplicate are shown. \*P < 0.05. **B.** TCID50/mL, determined via titration of supernatant from SARS-CoV-2-infected WT, control and USP22 KO Caco-2 cells (USP22 KO #1 and #6) 6 and 24 hpi on Vero cells. Mean and SD of three independent experiments in triplicate are shown.

**C.** Idem, 24 hpi, supernatant additionally of NHT-, USP22 KO #1- and #6-STING dKO

Caco-2 cells.

### Supplementary Table 1: List of qRT-PCR primers used in this study

|         | <i>Forward primer</i>     | <i>Reverse primer</i>      |
|---------|---------------------------|----------------------------|
| TGFB1   | ACTACTACGCCAAGGAGGTCAC    | TGCTTGAAC TTGTCATAGATTTTCG |
| SLFN5   | AGCAAGCCTGTGTGCATTC       | ACCACTCTGTCTGAAAATACTGGA   |
| TGM2    | GGCACCAAGTACCTGCTCA       | AGAGGATGCAAAGAGGAACG       |
| DDX60   | AATCCCACAGGACTGCACA       | TCGACCAAATACCTTCTGCAA      |
| USP22   | GAAGATCACCACGTATGTGTCC    | CATTCATCCTGCTCTCTTTGC      |
| AK4     | CACTGGTGAACCGTTAGTCCA     | AGCACTCCTCGGCTCTTGT        |
| CXCR4   | GGCCCTCAAGACCACAGTCA      | TTAGCTGGAGTGAAAAC TTGAAG   |
| BST2    | CCACCTGCAACCACACTG        | CCTGAAGCTTATGGTTTAATGTAGTG |
| PARP9   | CTGTCTGCACCGAGGAGAG       | GCGCTTCAAAGCATAGACTGT      |
| USP18   | TCCCGACGTGGAAC TCA G      | CAGGCACGATGGAATCTCTC       |
| OAS3    | TCCCATCAAAGTGATCAAGGT     | ACGAGGTCGGCATCTGAG         |
| IFIT1   | CTTGTGGGTAATACAGTGGAGATG  | GCTCCAGACTATCCTTGACCTG     |
| IRF9    | AGCCTGGACAGCAACTCAG       | GAAACTGCCCACTCTCCACT       |
| ISG15   | GAGGCAGCGAACTCATCTTT      | AGCATCTTCACCGTCAGGTC       |
| OAS2    | TGCAGGGAGTGGCCATAG        | TCTGATCCTGGAATTGTTTTAAGTC  |
| IFI27   | GTGGCCAAAGTGGTCAGG        | CCAATCACA ACTGTAGCAATCC    |
| IFI6    | AACCGTTTACTCGCTGCTGT      | GGGCTCCGTCACTAGACCT        |
| panIFNA | TCCATGAGVTGATBCAGCAGA     | ATTTCTGCTCTGACAACCTCCC     |
| IFNB1   | ATGACCAACAAGTGCTCCTCC     | GGAATCCAAGCAAGTTGTAGCTC    |
| IFNL1   | GGACGCCTTGGAAGAGTCAC      | AGCTGGGAGAGGATGTGGT        |
| COV1    | GCCTCTTCTGTTCTCATCAC      | AGACAGCATCACCGCCATTG       |
| TBP     | CCACTCACAGACTCTCACAAC     | CCACTCACAGACTCTCACAAC      |
| DDX58   | TGTGGGCAATGTCATCAAAA      | GAAGCACTTGCTACCTCTTGC      |
| TMEM173 | ACATTCGCTTCCCTGGATAAACT   | CTGCTGT CATCTGCAGGTTTC     |
| IFIH1   | TTTTGCAGATTCTTCTGTAGTTTCA | TGCTGTTATGTCCAAGACTTTCA    |
